# Supplementary material for: Palladium-catalyzed oxidative C–H/C–H cross-coupling of benzothiazoles with thiophenes and thiazoles
Source: Royal Society of Chemistry journal article supplement (doi:10.1039/c4cc00362d), 2014-01-01

## Supplementary Information

for

### **Palladium-Catalyzed Oxidative C–H/C–H Cross-Coupling of Benzothiazoles with Thiophenes and Thiazoles**

**Xuxing Chen, Xiaojing Huang, Qian He, Yuyuan Xie, and Chunhao Yang\***

*State Key Laboratory of Drug Research, Shanghai Institute of Materia Medica, Chinese Academy  
of Sciences, 555 Zuchongzhi Road, Shanghai 201203, PR China*

[chyang@simm.ac.cn](mailto:chyang@simm.ac.cn)

#### Table of Contents

|                                                                                                            |     |
|------------------------------------------------------------------------------------------------------------|-----|
| General information.....                                                                                   | S2  |
| Optimization of reaction conditions .....                                                                  | S2  |
| General procedure for cross-dehydrogenative coupling of benzothiazoles with thiophenes and thiazoles ..... | S4  |
| The H/D exchange experiment for <b>1a</b> .....                                                            | S12 |
| Kinetic isotope experiments .....                                                                          | S14 |
| <sup>1</sup> H NMR, <sup>13</sup> C NMR and HSQC spectra.....                                              | S17 |

## General information

Analytical thin layer chromatography (TLC) was HSGF 254 (0.15–0.2 mm thickness, Yantai Huiyou Company, China). Column chromatography was carried out on silica gel (200–300 mesh). NMR spectra were recorded at Varian Mercury-300 spectrometer, Varian Mercury-400 spectrometer and Varian Mercury-500 spectrometers (300 MHz or 400 MHz for  $^1\text{H}$  NMR, 100 MHz or 125 MHz for  $^{13}\text{C}$  NMR). Tetramethylsilane (TMS) was used as internal standard. Chemical shifts were reported in parts per million (ppm,  $\delta$ ). Proton coupling patterns are described as singlet (s), doublet (d), triplet (t), quartet (q), heptet (hept), multipet (m) and broad (br). Low- and high-resolution mass spectra (LRMS and HRMS) were recorded on a Finnigan/MAT-95 (EI), Finnigan LCQ/DECA and Micromass Ultra Q-TOF (ESI) spectrometer. LC-MS was performed on an Agilent 1200-6110 instrument. Melting points (m.p.) were measured by Büchi 510 melting point apparatus and were uncorrected.

## Optimization of reaction conditions

**Table S1** Screening of Oxidants.<sup>a</sup>

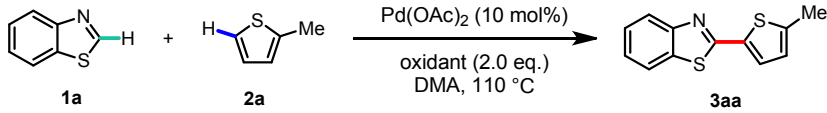

| Entry           | Oxidant                         | Time (h) | Yield <sup>b</sup> (%) |
|-----------------|---------------------------------|----------|------------------------|
| 1               | Cu(OAc) <sub>2</sub>            | 20       | 11                     |
| 2               | CuBr <sub>2</sub>               | 20       | Trace                  |
| 3               | CuCl <sub>2</sub>               | 20       | Trace                  |
| 4               | Cu(OTf) <sub>2</sub>            | 20       | Trace                  |
| 5               | AgOAc                           | 20       | 18                     |
| 6               | AgTFA                           | 20       | 6                      |
| 7               | Ag <sub>2</sub> CO <sub>3</sub> | 20       | 21                     |
| 8               | Ag <sub>2</sub> SO <sub>4</sub> | 20       | Trace                  |
| 9               | Ag <sub>2</sub> O               | 20       | 13                     |
| 10              | AgNO <sub>3</sub>               | 12       | 28                     |
| 11 <sup>c</sup> | AgNO <sub>3</sub>               | 12       | 27                     |
| 12              | O <sub>2</sub>                  | 20       | 0                      |
| 13              | BQ                              | 20       | Trace                  |

<sup>a</sup> **1a** (1.0 mmol, 1.0 equiv), **2a** (4.0 mmol, 4.0 equiv), DMA (3.0 mL), all of reagents were mixed and stirred at r.t. for 5 minutes, then the sealed tubes were screw capped and heated at 110

°C for indicated time. <sup>b</sup> Yield Determined by <sup>1</sup>H NMR analysis of the crude product using dimethyl terephthalate as an internal standard. <sup>c</sup> The reaction was carried out under N<sub>2</sub> atmosphere.

**Table S2** Screening of Ligands.<sup>a</sup>

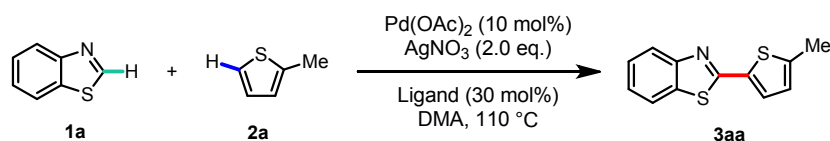

| Entry | Ligand                                        | Time (h) | Yield <sup>b</sup> (%) |
|-------|-----------------------------------------------|----------|------------------------|
| 1     | –                                             | 12       | 28                     |
| 2     | AcOH                                          | 12       | 29                     |
| 3     | PivOH                                         | 10       | 36                     |
| 4     | Me-Gly-OH                                     | 5        | 18                     |
| 5     | (Me) <sub>2</sub> -Gly-OH                     | 5        | 17                     |
| 6     | Pro-OH                                        | 12       | 14                     |
| 7     | Boc-Me-Ala-OH                                 | 2        | 22                     |
| 8     | PhCO <sub>2</sub> H                           | 10       | 15                     |
| 9     | <i>p</i> NO <sub>2</sub> -PhCO <sub>2</sub> H | 10       | 12                     |
| 10    | Bipy                                          | 10       | 45                     |
| 11    | Phen                                          | 10       | 50                     |
| 12    | Phen (15 mol%), Boc-Me-Ala-OH (15 mol%)       | 4        | 41                     |
| 13    | Phen (15 mol%), PivOH (15 mol%)               | 4        | 40                     |

<sup>a</sup> **1a** (1.0 mmol, 1.0 equiv), **2a** (4.0 mmol, 4.0 equiv), DMA (3.0 mL), all of reagents were mixed and stirred at r.t. for 5 minutes, then the sealed tubes were screw capped and heated at 110 °C until **1a** disappeared. <sup>b</sup> Determined by <sup>1</sup>H NMR analysis of the crude product using dimethyl terephthalate as an internal standard.

**Table S3** Screening of Solvents.<sup>a</sup>

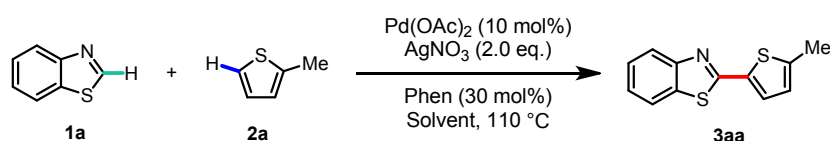

| Entry | Solvent       | Time (h) | Yield <sup>b</sup> (%) |
|-------|---------------|----------|------------------------|
| 1     | DMA           | 10       | 50                     |
| 2     | DMF           | 10       | 31                     |
| 3     | NMP           | 10       | 27                     |
| 4     | DMSO          | 10       | 69(63) <sup>c</sup>    |
| 5     | Dioxane       | 10       | 27                     |
| 6     | EtAc          | 10       | 8                      |
| 7     | DME           | 10       | 12                     |
| 8     | <i>n</i> BuOH | 10       | 21                     |

<sup>a</sup> **1a** (1.0 mmol, 1.0 equiv), **2a** (4.0 mmol, 4.0 equiv), solvent (3.0 mL), all of reagents were mixed and stirred at r.t. for 5 minutes, then the sealed tubes were screw capped and heated at 110 °C until **1a** disappeared. <sup>b</sup> Determined by <sup>1</sup>H NMR analysis of the crude product using dimethyl

terephthalate as an internal standard. <sup>c</sup> The isolated yield was given in parentheses.

**Table S4** Screening of Bases.<sup>a</sup>

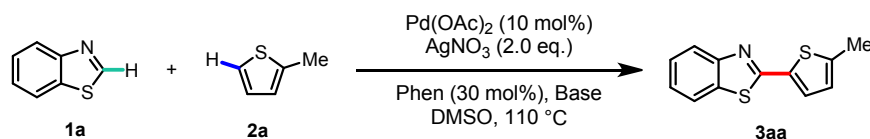

| Entry          | Base                                               | Time (h) | Yield <sup>b</sup> (%) |
|----------------|----------------------------------------------------|----------|------------------------|
| 1              | –                                                  | 10       | 69                     |
| 2 <sup>c</sup> | –                                                  | 10       | 6                      |
| 3              | NaOAc                                              | 10       | 24                     |
| 4              | Na <sub>2</sub> CO <sub>3</sub>                    | 10       | 32                     |
| 5              | K <sub>2</sub> CO <sub>3</sub>                     | 10       | 33                     |
| 6              | KF                                                 | 10       | 37                     |
| 7              | Na <sub>3</sub> PO <sub>4</sub> ·3H <sub>2</sub> O | 10       | 15                     |

<sup>a</sup> **1a** (1.0 mmol, 1.0 equiv), **2a** (4.0 mmol, 4.0 equiv), DMSO (3.0 mL), all of reagents were mixed and stirred at r.t. for 5 minutes, then the sealed tubes were screw capped and heated at 110 °C until **1a** disappeared. <sup>b</sup> Determined by <sup>1</sup>H NMR analysis of the crude product using dimethyl terephthalate as an internal standard. <sup>c</sup> TEMPO (30 mol%) was added.

**Table S5** Screening of loadings of reagents.<sup>a</sup>

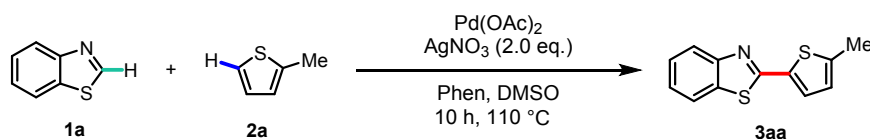

| Entry | Reagent              | Loading   | Yield <sup>b</sup> (%) |
|-------|----------------------|-----------|------------------------|
| 1     | Pd(OAc) <sub>2</sub> | 5 mol%    | 18                     |
| 2     | Pd(OAc) <sub>2</sub> | 2.5 mol%  | trace                  |
| 3     | Pd(OAc) <sub>2</sub> | 0         | 0                      |
| 4     | Phen                 | 1.0 equiv | 42                     |

<sup>a</sup> **1a** (1.0 mmol, 1.0 equiv), **2a** (4.0 mmol, 4.0 equiv), DMSO (3.0 mL), all of reagents were mixed and stirred at r.t. for 5 minutes, then the sealed tubes were screw capped and heated at 110 °C for 10 h. <sup>b</sup> Determined by <sup>1</sup>H NMR analysis of the crude product using dimethyl terephthalate as an internal standard.

## General procedure for cross-dehydrogenative coupling of benzothiazoles with thiophenes

### and thiazoles

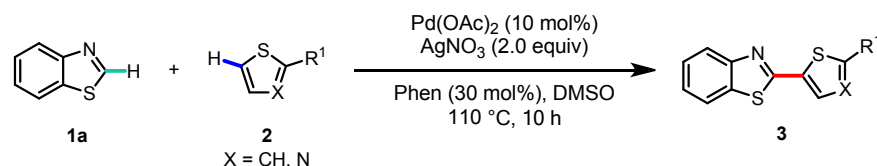

To a septum capped 25 mL of sealed tube were added Pd(OAc)<sub>2</sub> (10 mol%), AgNO<sub>3</sub> (2.0 equiv)

and 1,10-Phenanthroline hydrate (30 mol%) under air, followed by DMSO (3.0 mL) with stirring. Benzothiazoles **1** (1.0 mmol, 1.0 equiv) and thiophenes/thiazoles **2** (4.0 equiv) were then added subsequently. The sealed tube was screw capped and heated to 110 °C. After being stirred for 10 h, the reaction mixture was cooled to room temperature, diluted with 20 mL of CH<sub>2</sub>Cl<sub>2</sub>, filtered through a celite pad, washed with 80 mL of CH<sub>2</sub>Cl<sub>2</sub>. The combined organic extracts were concentrated and the resulting residue was purified by column chromatography on silica gel with petroleum ether/ethyl acetate (PE/EA) to provide the desired product.

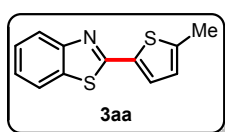

**2-(5-Methylthiophen-2-yl)benzo[d]thiazole<sup>1</sup>:** As a pale brown powder (PE:EA = 40:1 v:v); m.p. 95–97 °C; <sup>1</sup>H NMR (400 MHz, CDCl<sub>3</sub>) δ 7.99 (ddd, *J* = 8.2, 1.2, 0.6 Hz, 1 H), 7.83 (ddd, *J* = 8.0, 1.3, 0.6 Hz, 1 H), 7.48–7.42 (m, 2 H), 7.34 (ddd, *J* = 8.0, 7.3, 1.2 Hz, 1 H), 6.80 (dq, *J* = 3.4, 1.1 Hz, 1 H), 2.56 (d, *J* = 1.0 Hz, 3 H); <sup>13</sup>C NMR (100 MHz, CDCl<sub>3</sub>) δ 161.59, 153.66, 144.68, 134.79, 134.46, 128.84, 126.43, 126.27, 124.92, 122.70, 121.33, 15.67; HRMS (EI): *m/z* Calcd. For C<sub>12</sub>H<sub>9</sub>NS<sub>2</sub> [M]<sup>+</sup>: 231.0176; Found: 231.0149.

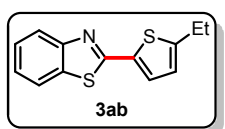

**2-(5-Ethylthiophen-2-yl)benzo[d]thiazole:** As brown oil which solidified at room temperature (PE:EA = 40:1 v:v); <sup>1</sup>H NMR (300 MHz, CDCl<sub>3</sub>) δ 8.00 (ddd, *J* = 8.2, 1.2, 0.6 Hz, 1 H), 7.82 (ddd, *J* = 7.9, 1.3, 0.6 Hz, 1 H), 7.50–7.41 (m, 2 H), 7.34 (ddd, *J* = 7.9, 7.3, 1.2 Hz, 1 H), 6.82 (dt, *J* = 3.7, 1.0 Hz, 1 H), 2.91 (qd, *J* = 7.5, 0.8 Hz, 2 H), 1.36 (t, *J* = 7.5 Hz, 3 H); <sup>13</sup>C NMR (100 MHz, CDCl<sub>3</sub>) δ 161.69, 153.67, 152.37, 134.49, 134.40, 128.67, 126.27, 124.91, 124.62, 122.69, 121.34, 23.77, 15.69; HRMS (EI): *m/z* Calcd. For C<sub>13</sub>H<sub>11</sub>NS<sub>2</sub> [M]<sup>+</sup>: 245.0333; Found: 245.0325.

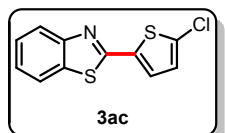

**2-(5-Chlorothiophen-2-yl)benzo[d]thiazole<sup>2</sup>:** As a pale yellow powder (PE:EA = 40:1 v:v); m.p. 103–105 °C; <sup>1</sup>H NMR (300 MHz, CDCl<sub>3</sub>) δ 8.00 (ddd, *J* = 8.2, 1.2, 0.6 Hz, 1 H), 7.84 (ddd, *J* = 8.0, 1.2, 0.6 Hz, 1 H), 7.48 (ddd, *J* = 8.4, 7.3, 1.3 Hz, 1 H), 7.43–7.32 (m, 2 H), 6.96 (d, *J* = 4.0 Hz, 1 H); <sup>13</sup>C NMR (100MHz, CDCl<sub>3</sub>) δ 160.28, 153.41, 135.79, 134.43, 134.38, 127.62, 127.19, 126.52, 125.40, 122.96, 121.44; HRMS (EI): *m/z* Calcd. For C<sub>11</sub>H<sub>6</sub>ClNS<sub>2</sub> [M]<sup>+</sup>: 250.9630; Found: 250.9621.

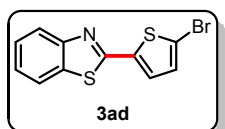

**2-(5-Bromothiophen-2-yl)benzo[d]thiazole<sup>3</sup>:** As a pale yellow powder (PE:EA = 40:1 v:v); m.p. 110–112 °C; <sup>1</sup>H NMR (300 MHz, CDCl<sub>3</sub>) δ 8.01 (ddd, *J* = 8.1, 1.3, 0.6 Hz, 1 H), 7.85 (ddd, *J* = 7.9, 1.4, 0.6 Hz, 1 H), 7.48

(ddd,  $J = 8.3, 7.2, 1.4$  Hz, 1 H), 7.41–7.33 (m, 2 H), 7.10 (d,  $J = 4.0$  Hz, 1 H);  $^{13}\text{C}$  NMR (100 MHz,  $\text{CDCl}_3$ )  $\delta$  160.15, 153.45, 138.66, 134.44, 130.88, 128.43, 126.53, 125.43, 122.99, 121.45, 117.10; HRMS (EI):  $m/z$  Calcd. For  $\text{C}_{11}\text{H}_6\text{BrNS}_2$   $[\text{M}]^+$ : 294.9125; Found: 294.9124.

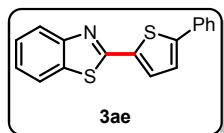

**2-(5-Phenylthiophen-2-yl)benzo[d]thiazole<sup>1</sup>:** As a yellow powder (PE:EA = 80:1 v:v); m.p. 156–158 °C;  $^1\text{H}$  NMR (300 MHz,  $\text{CDCl}_3$ )  $\delta$  8.08–7.99 (m, 1 H), 7.90–7.80 (m, 1 H), 7.71–7.65 (m, 2 H), 7.62 (d,  $J = 3.9$  Hz, 1 H), 7.52–7.32 (m, 6 H);  $^{13}\text{C}$  NMR (125 MHz,  $\text{CDCl}_3$ )  $\delta$  161.28, 153.71, 148.19, 136.09, 134.66, 133.52, 129.55, 129.12, 128.49, 126.49, 125.97, 125.22, 123.92, 122.90, 121.47; HRMS (EI):  $m/z$  Calcd. For  $\text{C}_{17}\text{H}_{11}\text{NS}_2$   $[\text{M}]^+$ : 293.0333; Found: 293.0038.

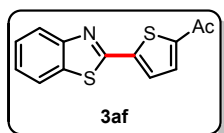

**1-(5-(Benzo[d]thiazol-2-yl)thiophen-2-yl)ethanone<sup>4</sup>:** As a pale yellow powder (PE:EA = 30:1 v:v); m.p. 188–190 °C;  $^1\text{H}$  NMR (300 MHz,  $\text{CDCl}_3$ )  $\delta$  8.20–7.96 (m, 1 H), 7.93–7.86 (m, 1 H), 7.70 (d,  $J = 4.0$  Hz, 1 H), 7.65 (d,  $J = 4.0$  Hz, 1 H), 7.61–7.48 (m, 1 H), 7.50–7.36 (m, 1 H), 2.61 (s, 3 H);  $^{13}\text{C}$  NMR (125 MHz,  $\text{CDCl}_3$ )  $\delta$  190.49, 160.05, 153.60, 146.01, 144.05, 135.12, 132.57, 128.47, 126.81, 125.97, 123.51, 121.62, 26.97; HRMS (EI):  $m/z$  Calcd. For  $\text{C}_{13}\text{H}_9\text{NOS}_2$   $[\text{M}]^+$ : 259.0126; Found: 259.0120.

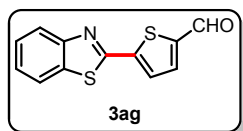

**5-(Benzo[d]thiazol-2-yl)thiophene-2-carbaldehyde<sup>4</sup>:** As a yellow powder (PE:EA = 10:1 v:v); m.p. 146–148 °C;  $^1\text{H}$  NMR (300 MHz,  $\text{CDCl}_3$ )  $\delta$  9.96 (s, 1 H), 8.08 (ddd,  $J = 8.1, 1.2, 0.6$  Hz, 1 H), 7.88 (ddd,  $J = 8.0, 1.2, 0.6$  Hz, 1 H), 7.76 (d,  $J = 4.0$  Hz, 1 H), 7.70 (d,  $J = 4.0$  Hz, 1 H), 7.52 (ddd,  $J = 8.3, 7.2, 1.3$  Hz, 1 H), 7.43 (ddd,  $J = 8.3, 7.2, 1.3$  Hz, 1 H);  $^{13}\text{C}$  NMR (100 MHz,  $\text{CDCl}_3$ )  $\delta$  182.87, 159.65, 153.54, 145.48, 145.18, 136.19, 135.20, 128.41, 126.87, 126.13, 123.61, 121.61; HRMS (EI):  $m/z$  Calcd. For  $\text{C}_{12}\text{H}_7\text{NOS}_2$   $[\text{M}]^+$ : 244.9969; Found: 244.9961.

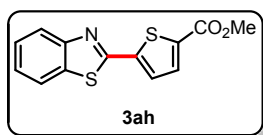

**Methyl 5-(benzo[d]thiazol-2-yl)thiophene-2-carboxylate<sup>5</sup>:** As a pale yellow powder (PE:EA = 20:1 v:v); m.p. 162–164 °C;  $^1\text{H}$  NMR (300 MHz,  $\text{CDCl}_3$ )  $\delta$  8.06 (ddd,  $J = 8.2, 1.2, 0.6$  Hz, 1 H), 7.88 (ddd,  $J = 8.0, 1.3, 0.6$  Hz, 1 H), 7.79 (d,  $J = 4.0$  Hz, 1 H), 7.61 (d,  $J = 4.0$  Hz, 1 H), 7.51 (ddd,  $J = 8.2, 7.3, 1.3$  Hz, 1 H), 7.41 (ddd,  $J = 8.3, 7.2, 1.2$  Hz, 1 H), 3.93 (s, 3 H);  $^{13}\text{C}$  NMR (100 MHz,  $\text{CDCl}_3$ )  $\delta$  162.18, 160.06, 153.52, 143.02, 135.72, 134.95, 133.75, 128.11, 126.69, 125.81, 123.38, 121.54, 52.46; HRMS (EI):  $m/z$  Calcd. For  $\text{C}_{13}\text{H}_9\text{NO}_2\text{S}_2$   $[\text{M}]^+$ : 275.0075; Found: 275.0066.

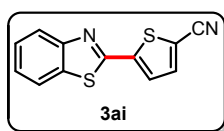

**5-(Benzo[d]thiazol-2-yl)thiophene-2-carbonitrile<sup>1</sup>:** As a pale yellow  
S6

powder (PE:EA = 30:1 v:v); m.p. 176–178 °C; <sup>1</sup>H NMR (300 MHz, CDCl<sub>3</sub>) δ 8.07 (ddd, *J* = 8.2, 1.3, 0.6 Hz, 1 H), 7.90 (ddd, *J* = 7.9, 1.4, 0.7 Hz, 1 H), 7.63 (d, *J* = 4.0 Hz, 1 H), 7.59 (d, *J* = 4.0 Hz, 1 H), 7.54 (ddd, *J* = 8.3, 7.2, 1.4 Hz, 1 H), 7.45 (ddd, *J* = 7.9, 7.2, 1.3 Hz, 1 H); <sup>13</sup>C NMR (100 MHz, CDCl<sub>3</sub>) δ 158.64, 153.33, 143.79, 137.86, 134.96, 127.44, 126.99, 126.29, 123.59, 121.66, 113.67, 112.01; HRMS (EI): *m/z* Calcd. For C<sub>12</sub>H<sub>6</sub>N<sub>2</sub>S<sub>2</sub> [M]<sup>+</sup>: 241.9972; Found: 242.0001.

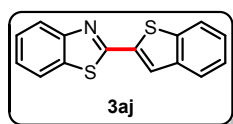

**2-(Benzo[*b*]thiophen-2-yl)benzo[*d*]thiazole<sup>6</sup>:** As a pale yellow powder (PE:EA = 100:1 v:v); m.p. 193–195 °C; <sup>1</sup>H NMR (300 MHz, CDCl<sub>3</sub>) δ 8.09 (ddd, *J* = 8.2, 1.2, 0.6 Hz, 1 H), 7.95–7.73 (m, 4 H), 7.50 (td, *J* = 8.3, 7.7, 1.3 Hz, 1 H), 7.45–7.33 (m, 3 H); <sup>13</sup>C NMR (125 MHz, CDCl<sub>3</sub>) δ 161.48, 153.68, 140.82, 139.53, 137.14, 135.01, 126.58, 126.17, 125.63, 125.33, 125.00, 124.59, 123.34, 122.62, 121.54; HRMS (EI): *m/z* Calcd. For C<sub>15</sub>H<sub>9</sub>NS<sub>2</sub> [M]<sup>+</sup>: 267.0176; Found: 267.0169.

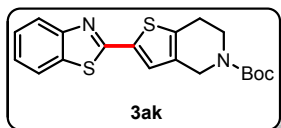

**Tert-butyl 2-(benzo[*d*]thiazol-2-yl)-6,7-dihydrothieno[3,2-*c*]pyridine-5(4*H*)-carboxylate:** As yellow oil which solidified at room temperature (PE:EA = 10:1 v:v); <sup>1</sup>H NMR (300 MHz, CDCl<sub>3</sub>) δ 7.99 (ddd, *J* = 8.2, 1.2, 0.6 Hz, 1 H), 7.83 (ddd, *J* = 8.0, 1.3, 0.6 Hz, 1 H), 7.46 (ddd, *J* = 8.3, 7.3, 1.3 Hz, 1 H), 7.39–7.31 (m, 2 H), 4.52 (brs, 2 H), 3.76 (t, *J* = 5.5 Hz, 2 H), 2.90 (t, *J* = 5.5 Hz, 2 H), 1.50 (s, 9 H); **conformational isomer 1:** <sup>13</sup>C NMR (125 MHz, CDCl<sub>3</sub>) δ 161.26, 154.74, 153.62, 138.42, 134.76, 134.57, 133.38, 126.39, 125.13, 122.79, 121.41, 80.23, 44.12, 40.58, 28.47, 25.43; **conformational isomer 2:** <sup>13</sup>C NMR (125 MHz, CDCl<sub>3</sub>) δ 161.26, 154.74, 153.62, 137.95, 134.76, 134.57, 133.75, 126.39, 125.13, 122.79, 121.41, 80.23, 43.44, 41.80, 28.47, 25.31; HRMS (EI): *m/z* Calcd. For C<sub>19</sub>H<sub>20</sub>N<sub>2</sub>O<sub>2</sub>S<sub>2</sub> [M]<sup>+</sup>: 372.0966; Found: 372.0965.

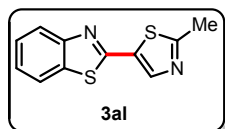

**2-(2-Methylthiazol-5-yl)benzo[*d*]thiazole<sup>7</sup>:** As a pale yellow powder (PE:EA = 20:1 v:v); m.p. 123–125 °C; <sup>1</sup>H NMR (300 MHz, CDCl<sub>3</sub>) δ 8.15 (s, 1 H), 8.02 (ddd, *J* = 8.0, 1.2, 0.6 Hz, 1 H), 7.87 (ddd, *J* = 7.9, 1.3, 0.7 Hz, 1 H), 7.49 (ddd, *J* = 8.2, 7.2, 1.3 Hz, 1 H), 7.40 (ddd, *J* = 7.9, 7.2, 1.2 Hz, 1 H), 2.79 (s, 3 H); <sup>13</sup>C NMR (100 MHz, CDCl<sub>3</sub>) δ 169.25, 158.37, 153.35, 142.78, 134.39, 132.60, 126.55, 125.59, 123.01, 121.49, 19.59; HRMS (EI): *m/z* Calcd. For C<sub>11</sub>H<sub>8</sub>N<sub>2</sub>S<sub>2</sub> [M]<sup>+</sup>: 232.0129; Found: 232.0121.

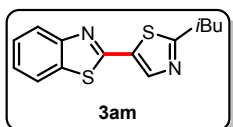

**2-(2-Isobutylthiazol-5-yl)benzo[*d*]thiazole:** As colorless oil which solidified at room temperature (PE:EA = 20:1 v:v); <sup>1</sup>H NMR (300 MHz, CDCl<sub>3</sub>) δ 8.18 (s, 1 H), 8.02 (ddd, *J* = 8.2, 1.3, 0.7 Hz, 1 H), 7.86 (ddd, *J* =

7.9, 1.3, 0.6 Hz, 1 H), 7.48 (ddd,  $J = 8.3, 7.2, 1.3$  Hz, 1 H), 7.39 (ddd,  $J = 8.3, 7.2, 1.3$  Hz, 1 H), 2.93 (d,  $J = 7.2$  Hz, 2 H), 2.17 (hept,  $J = 6.8$  Hz, 1 H), 1.03 (d,  $J = 6.7$  Hz, 6 H);  $^{13}\text{C}$  NMR (100 MHz,  $\text{CDCl}_3$ )  $\delta$  173.05, 169.31, 157.61, 152.92, 142.38, 134.12, 132.88, 126.26, 125.39, 122.74, 121.16, 69.39, 20.61, 20.34; HRMS (EI):  $m/z$  Calcd. For  $\text{C}_{14}\text{H}_{14}\text{N}_2\text{S}_2$   $[\text{M}]^+$ : 274.0598; Found: 274.0604.

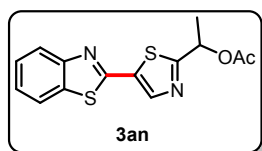

**1-(5-(Benzo[d]thiazol-2-yl)thiazol-2-yl)ethyl acetate:** As a pale yellow powder (PE:EA = 8:1 v:v); m.p. 108–109 °C;  $^1\text{H}$  NMR (300 MHz,  $\text{CDCl}_3$ )  $\delta$  8.22 (s, 1 H), 8.03 (ddd,  $J = 8.2, 1.2, 0.6$  Hz, 1 H), 7.87 (ddd,  $J = 8.0, 1.3, 0.7$  Hz, 1 H), 7.50 (ddd,  $J = 8.3, 7.3, 1.3$  Hz, 1 H), 7.45 – 7.35 (m, 1 H), 6.18 (q,  $J = 6.6$  Hz, 1 H), 2.18 (s, 3 H), 1.73 (d,  $J = 6.6$  Hz, 3 H);  $^{13}\text{C}$  NMR (100 MHz,  $\text{CDCl}_3$ )  $\delta$  173.24, 158.10, 152.97, 142.35, 134.00, 131.82, 126.14, 125.17, 122.60, 121.10, 42.22, 29.44, 21.85; HRMS (EI):  $m/z$  Calcd. For  $\text{C}_{14}\text{H}_{12}\text{N}_2\text{O}_2\text{S}_2$   $[\text{M}]^+$ : 304.0340; Found: 304.0342.

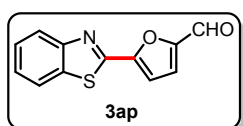

**5-(Benzo[d]thiazol-2-yl)furan-2-carbaldehyde<sup>8</sup>:** As a brown powder (PE:EA = 30:1 v:v); m.p. 180–182 °C;  $^1\text{H}$  NMR (300 MHz,  $\text{CDCl}_3$ )  $\delta$  9.79 (s, 1 H), 8.10 (ddd,  $J = 8.2, 1.3, 0.7$  Hz, 1 H), 7.95 (ddd,  $J = 8.0, 1.3, 0.7$  Hz, 1 H), 7.54 (dd,  $J = 8.2, 1.4$  Hz, 1 H), 7.46 (dd,  $J = 8.0, 1.3$  Hz, 1 H), 7.39 (d,  $J = 3.8$  Hz, 1 H), 7.35 (d,  $J = 3.8$  Hz, 1 H);  $^{13}\text{C}$  NMR (100 MHz,  $\text{CDCl}_3$ )  $\delta$  177.87, 155.84, 153.63, 153.15, 152.78, 134.88, 126.92, 126.20, 123.69, 121.83, 121.60, 112.53; HRMS (EI):  $m/z$  Calcd. For  $\text{C}_{12}\text{H}_7\text{NO}_2\text{S}$   $[\text{M}]^+$ : 229.0197; Found: 229.0193.

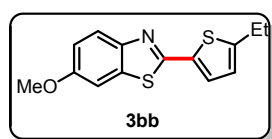

**2-(5-Ethylthiophen-2-yl)-6-methoxybenzo[d]thiazole:** As a brown powder (PE:EA = 20:1 v:v); m.p. 74–76 °C;  $^1\text{H}$  NMR (300 MHz,  $\text{CDCl}_3$ )  $\delta$  7.87 (d,  $J = 9.0$  Hz, 1 H), 7.41 (d,  $J = 3.7$  Hz, 1 H), 7.29 (d,  $J = 2.5$  Hz, 1 H), 7.05 (dd,  $J = 8.9, 2.5$  Hz, 1 H), 6.80 (dt,  $J = 3.7, 1.0$  Hz, 1 H), 3.88 (s, 3 H), 2.90 (qd,  $J = 7.5, 1.0$  Hz, 2 H), 1.36 (t,  $J = 7.5$  Hz, 3 H);  $^{13}\text{C}$  NMR (100 MHz,  $\text{CDCl}_3$ )  $\delta$  159.33, 157.55, 151.64, 148.15, 135.85, 134.55, 127.93, 124.47, 123.18, 115.30, 104.15, 55.75, 23.73, 15.70; HRMS (EI):  $m/z$  Calcd. For  $\text{C}_{14}\text{H}_{13}\text{NOS}_2$   $[\text{M}]^+$ : 275.0439; Found: 275.0445.

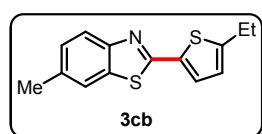

**2-(5-Ethylthiophen-2-yl)-6-methylbenzo[d]thiazole:** As brown oil which solidified at room temperature (PE:EA = 40:1 v:v);  $^1\text{H}$  NMR (300 MHz,  $\text{CDCl}_3$ )  $\delta$  7.87 (d,  $J = 8.3$  Hz, 1 H), 7.61 (dd,  $J = 1.8, 1.0$  Hz, 1 H), 7.45 (d,  $J = 3.7$  Hz, 1 H), 7.26 (dd,  $J = 8.2, 1.9$  Hz, 1 H), 6.81 (dt,  $J = 3.7, 1.0$  Hz, 1 H), 2.90



(qd,  $J = 7.6, 1.0$  Hz, 2 H), 2.47 (s, 3 H), 1.36 (t,  $J = 7.5$  Hz, 3 H);  $^{13}\text{C}$  NMR (100 MHz,  $\text{CDCl}_3$ )  $\delta$  160.69, 151.99, 151.75, 135.06, 134.64, 134.56, 128.28, 127.80, 124.52, 122.19, 121.13, 23.75, 21.50, 15.71; HRMS (EI):  $m/z$  Calcd. For  $\text{C}_{14}\text{H}_{13}\text{NS}_2$   $[\text{M}]^+$ : 259.0489; Found: 259.0486.

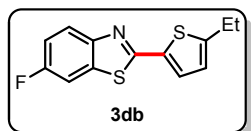

**2-(5-Ethylthiophen-2-yl)-6-fluorobenzo[d]thiazole:** As a pale yellow powder (PE:EA = 40:1 v:v); m.p. 102–103 °C;  $^1\text{H}$  NMR (300 MHz,  $\text{CDCl}_3$ )  $\delta$  7.92 (dd,  $J = 9.0, 4.8$  Hz, 1 H), 7.51 (dd,  $J = 8.1, 2.6$  Hz, 1 H), 7.45 (d,  $J = 3.7$  Hz, 1 H), 7.18 (td,  $J = 9.0, 2.6$  Hz, 1 H), 6.82 (dt,  $J = 3.7, 1.0$  Hz, 1 H), 2.91 (qd,  $J = 7.5, 1.0$  Hz, 2 H), 1.36 (t,  $J = 7.5$  Hz, 3 H);  $^{13}\text{C}$  NMR (100 MHz,  $\text{CDCl}_3$ )  $\delta$  161.39 (d,  $J = 3.4$  Hz, C–CH–CH–CF), 160.26 (d,  $J = 246.0$  Hz, C–F), 152.48, 150.27, 135.46 (d,  $J = 10.8$  Hz, C–CH–CF), 134.04, 128.69, 124.64, 123.50 (d,  $J = 9.4$  Hz, CH–CH–CF), 114.76 (d,  $J = 24.7$  Hz, CH–CF), 107.66 (d,  $J = 26.8$  Hz, CH–CF), 23.75, 15.67; HRMS (EI):  $m/z$  Calcd. For  $\text{C}_{13}\text{H}_{10}\text{FNS}_2$   $[\text{M}]^+$ : 263.0239; Found: 263.0241.

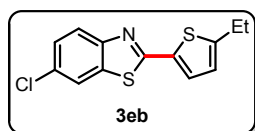

**6-Chloro-2-(5-ethylthiophen-2-yl)benzo[d]thiazole:** As a pale yellow powder (PE:EA = 40:1 v:v); m.p. 138–142 °C;  $^1\text{H}$  NMR (300 MHz,  $\text{CDCl}_3$ )  $\delta$  7.88 (d,  $J = 8.7$  Hz, 1 H), 7.79 (d,  $J = 2.1$  Hz, 1 H), 7.47 (d,  $J = 3.7$  Hz, 1 H), 7.40 (dd,  $J = 8.7, 2.1$  Hz, 1 H), 6.83 (dt,  $J = 3.7, 1.0$  Hz, 1 H), 2.91 (qd,  $J = 7.5, 1.0$  Hz, 2 H), 1.36 (t,  $J = 7.5$  Hz, 3 H);  $^{13}\text{C}$  NMR (100 MHz,  $\text{CDCl}_3$ )  $\delta$  162.10, 152.88, 152.24, 135.66, 133.91, 130.62, 128.99, 127.02, 124.72, 123.32, 120.93, 23.78, 15.65; HRMS (EI):  $m/z$  Calcd. For  $\text{C}_{13}\text{H}_{10}\text{ClNS}_2$   $[\text{M}]^+$ : 278.9943; Found: 278.9925.

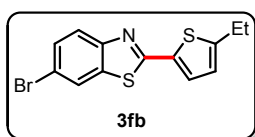

**6-Bromo-2-(5-ethylthiophen-2-yl)benzo[d]thiazole:** As a pale yellow powder (PE:EA = 40:1 v:v); m.p. 136–138 °C;  $^1\text{H}$  NMR (300 MHz,  $\text{CDCl}_3$ )  $\delta$  7.95 (d,  $J = 1.9$  Hz, 1 H), 7.83 (d,  $J = 8.7$  Hz, 1 H), 7.54 (dd,  $J = 8.7, 2.0$  Hz, 1 H), 7.48 (d,  $J = 3.7$  Hz, 1 H), 6.83 (dt,  $J = 3.8, 1.0$  Hz, 1 H), 2.91 (qd,  $J = 7.5, 0.9$  Hz, 2 H), 1.36 (t,  $J = 7.5$  Hz, 3 H);  $^{13}\text{C}$  NMR (100 MHz,  $\text{CDCl}_3$ )  $\delta$  162.12, 152.99, 152.58, 136.12, 133.86, 129.75, 129.05, 124.75, 123.85, 123.71, 118.24, 23.79, 15.66; HRMS (EI):  $m/z$  Calcd. For  $\text{C}_{13}\text{H}_{10}\text{BrNS}_2$   $[\text{M}]^+$ : 322.9438; Found: 322.9440.

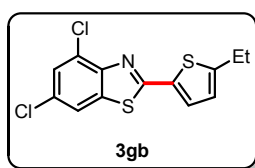

**4,6-Dichloro-2-(5-ethylthiophen-2-yl)benzo[d]thiazole:** As a brown powder (PE:EA = 40:1 v:v); m.p. 103–105 °C;  $^1\text{H}$  NMR (300 MHz,  $\text{CDCl}_3$ )  $\delta$  7.69 (d,  $J = 2.0$  Hz, 1 H), 7.50 (d,  $J = 3.8$  Hz, 1 H), 7.47 (d,  $J = 2.0$  Hz, 1 H), 6.83 (dt,  $J = 3.7, 1.0$  Hz, 1 H), 2.91 (qd,  $J = 7.7,$

1.1 Hz, 2 H), 1.36 (t,  $J = 7.5$  Hz, 3 H);  $^{13}\text{C}$  NMR (100 MHz,  $\text{CDCl}_3$ )  $\delta$  162.66, 153.67, 149.54, 136.56, 133.55, 130.42, 129.51, 127.80, 126.97, 124.82, 119.53, 23.82, 15.64; HRMS (EI):  $m/z$  Calcd. For  $\text{C}_{13}\text{H}_9\text{Cl}_2\text{NS}_2$   $[\text{M}]^+$ : 312.9553; Found: 312.9555.

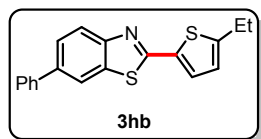

**2-(5-Ethylthiophen-2-yl)-6-phenylbenzo[d]thiazole:** As a pale yellow powder (PE:EA = 40:1 v:v); m.p. 126–128 °C;  $^1\text{H}$  NMR (300 MHz,  $\text{CDCl}_3$ )  $\delta$  8.10–8.01 (m, 2 H), 7.75–7.62 (m, 3 H), 7.54–7.44 (m, 3 H), 7.39 (t,  $J = 7.3$  Hz, 1 H), 6.85 (dt,  $J = 3.7, 1.0$  Hz, 1 H), 2.94 (dt,  $J = 7.4, 1.1$  Hz, 2 H), 1.39 (t,  $J = 7.5$  Hz, 3 H);  $^{13}\text{C}$  NMR (100 MHz,  $\text{CDCl}_3$ )  $\delta$  161.84, 153.02, 152.49, 140.54, 138.33, 135.29, 134.43, 128.86, 128.70, 127.42, 127.28, 125.94, 124.66, 122.73, 119.60, 23.79, 15.70; HRMS (EI):  $m/z$  Calcd. For  $\text{C}_{19}\text{H}_{15}\text{NS}_2$   $[\text{M}]^+$ : 321.0646; Found: 321.0645.

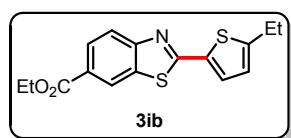

**Ethyl 2-(5-ethylthiophen-2-yl)benzo[d]thiazole-6-carboxylate:** As a pale yellow powder (PE:EA = 20:1 v:v); m.p. 122–124 °C;  $^1\text{H}$  NMR (300 MHz,  $\text{CDCl}_3$ )  $\delta$  8.55 (dd,  $J = 1.7, 0.6$  Hz, 1 H), 8.13 (dd,  $J = 8.6, 1.7$  Hz, 1 H), 7.99 (dd,  $J = 8.6, 0.6$  Hz, 1 H), 7.54 (d,  $J = 3.8$  Hz, 1 H), 6.85 (dt,  $J = 3.7, 1.0$  Hz, 1 H), 4.42 (q,  $J = 7.1$  Hz, 2 H), 2.92 (qd,  $J = 7.4, 0.8$  Hz, 2 H), 1.43 (t,  $J = 7.1$  Hz, 3 H), 1.37 (t,  $J = 7.5$  Hz, 3 H);  $^{13}\text{C}$  NMR (100 MHz,  $\text{CDCl}_3$ )  $\delta$  166.08, 164.85, 156.64, 153.54, 134.39, 133.97, 129.59, 127.59, 126.88, 124.89, 123.43, 122.17, 61.19, 23.81, 15.63, 14.34; HRMS (EI):  $m/z$  Calcd. For  $\text{C}_{16}\text{H}_{15}\text{NO}_2\text{S}_2$   $[\text{M}]^+$ : 317.0544; Found: 317.0546.

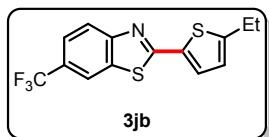

**2-(5-Ethylthiophen-2-yl)-6-(trifluoromethyl)benzo[d]thiazole:** As a pale yellow powder (PE:EA = 40:1 v:v); m.p. 139–142 °C;  $^1\text{H}$  NMR (300 MHz,  $\text{CDCl}_3$ )  $\delta$  8.13–8.09 (m, 1 H), 8.05 (dd,  $J = 8.8, 1.0$  Hz, 1 H), 7.71–7.65 (m, 1 H), 7.54 (d,  $J = 3.7$  Hz, 1 H), 6.86 (dt,  $J = 3.8, 0.9$  Hz, 1 H), 2.92 (qd,  $J = 7.6, 0.9$  Hz, 2 H), 1.37 (t,  $J = 7.6$  Hz, 3 H);  $^{13}\text{C}$  NMR (100 MHz,  $\text{CDCl}_3$ )  $\delta$  164.53, 155.69, 153.67, 134.56, 133.69, 129.69, 126.87 (q,  $J = 32.4$  Hz, C– $\text{CF}_3$ ), 123.90 (q,  $J = 272.2$  Hz, C– $\text{F}_3$ ), 124.90, 123.31 (q,  $J = 3.5$  Hz, CH–C– $\text{CF}_3$ ), 122.80, 118.95 (q,  $J = 4.2$  Hz, CH–C– $\text{CF}_3$ ), 23.80, 15.61; HRMS (EI):  $m/z$  Calcd. For  $\text{C}_{14}\text{H}_{10}\text{F}_3\text{NS}_2$ :  $[\text{M}]^+$ : 313.0207; Found: 313.0201.

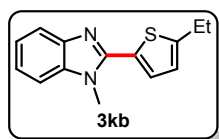

**2-(5-Eethylthiophen-2-yl)-1-methyl-1H-benzo[d]imidazole:** As brown oil which solidified at room temperature (PE:EA = 8:1 v:v);  $^1\text{H}$  NMR (300 MHz,  $\text{CDCl}_3$ )  $\delta$  7.81–7.75 (m, 1 H), 7.39 (d,  $J = 3.7$  Hz, 1 H), 7.37–7.32 (m, 1 H), 7.32–7.26 (m, 2 H), 6.88 (dt,  $J = 3.7, 0.8$  Hz, 1 H), 3.98 (s, 3 H), 2.92 (qd,  $J = 7.5, 0.8$  Hz, 2

H), 1.37 (t,  $J = 7.5$  Hz, 3 H);  $^{13}\text{C}$  NMR (126 MHz,  $\text{CDCl}_3$ )  $\delta$  151.17, 148.17, 142.85, 136.51, 129.69, 127.78, 124.29, 122.59, 122.42, 119.53, 109.19, 31.58, 23.50, 15.80; HRMS (EI):  $m/z$  Calcd. For  $\text{C}_{14}\text{H}_{14}\text{N}_2\text{S}$ :  $[\text{M}]^+$ : 242.0878; Found: 242.0885.

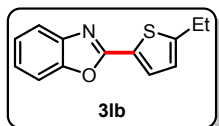

**2-(5-Ethylthiophen-2-yl)benzo[d]oxazole:** As brown oil which solidified at room temperature (PE:EA = 30:1 v:v);  $^1\text{H}$  NMR (300 MHz,  $\text{CDCl}_3$ )  $\delta$  7.73 (d,  $J = 3.7$  Hz, 1 H), 7.72–7.68 (m, 1 H), 7.55–7.49 (m, 1 H), 7.34–7.29 (m, 2 H), 6.88 (d,  $J = 3.7$  Hz, 1 H), 2.93 (q,  $J = 7.4$  Hz, 2 H), 1.37 (t,  $J = 7.4$  Hz, 3 H);  $^{13}\text{C}$  NMR (125 MHz,  $\text{CDCl}_3$ )  $\delta$  159.20, 153.43, 150.34, 142.08, 130.06, 126.61, 124.87, 124.71, 124.54, 119.56, 110.25, 23.71, 15.66; HRMS (EI):  $m/z$  Calcd. For  $\text{C}_{13}\text{H}_{11}\text{NS}$ :  $[\text{M}]^+$ : 229.0561; Found: 229.0558.

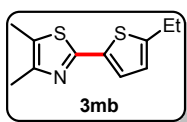

**2-(5-Ethylthiophen-2-yl)-4,5-dimethylthiazole:** As brown oil which solidified at room temperature (PE:EA = 40:1 v:v);  $^1\text{H}$  NMR (300 MHz,  $\text{CDCl}_3$ )  $\delta$  7.19 (d,  $J = 3.6$  Hz, 1 H), 6.71 (dt,  $J = 3.6, 1.0$  Hz, 1 H), 2.84 (qd,  $J = 7.5, 1.1$  Hz, 2 H), 2.34 (s, 3 H), 2.32 (s, 3 H), 1.31 (t,  $J = 7.5$  Hz, 3 H);  $^{13}\text{C}$  NMR (125 MHz,  $\text{CDCl}_3$ )  $\delta$  157.53, 149.36, 148.51, 134.96, 125.40, 125.06, 124.09, 23.60, 15.77, 14.69, 11.37. HRMS (EI):  $m/z$  Calcd. For  $\text{C}_{11}\text{H}_{13}\text{NS}_2$ :  $[\text{M}]^+$ : 223.0489; Found: 223.0480.

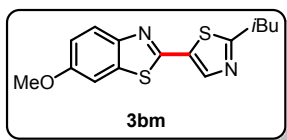

**2-(2-Isobutylthiazol-5-yl)-6-methoxybenzo[d]thiazole:** As pale yellow oil which solidified at room temperature (PE:EA = 15:1 v:v);  $^1\text{H}$  NMR (300 MHz,  $\text{CDCl}_3$ )  $\delta$  8.10 (s, 1 H), 7.89 (d,  $J = 8.9$  Hz, 1 H), 7.31 (d,  $J = 2.5$  Hz, 1 H), 7.07 (dd,  $J = 9.0, 2.5$  Hz, 1 H), 3.88 (s, 3 H), 2.92 (d,  $J = 7.2$  Hz, 2 H), 2.16 (hept,  $J = 13.5, 6.8$  Hz, 1 H), 1.03 (dd,  $J = 6.6, 0.7$  Hz, 6 H);  $^{13}\text{C}$  NMR (125 MHz,  $\text{CDCl}_3$ )  $\delta$  173.01, 158.01, 155.97, 147.90, 142.06, 135.88, 132.35, 123.50, 115.79, 104.03, 55.77, 42.60, 29.83, 22.25; HRMS (EI):  $m/z$  Calcd. For  $\text{C}_{15}\text{H}_{16}\text{N}_2\text{OS}_2$ :  $[\text{M}]^+$ : 304.0704; Found: 304.0701.

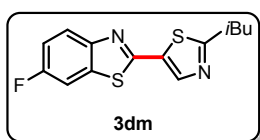

**6-Fluoro-2-(2-isobutylthiazol-5-yl)benzo[d]thiazole:** As a pale yellow powder (PE:EA = 20:1 v:v); m.p. 68–69 °C;  $^1\text{H}$  NMR (300 MHz,  $\text{CDCl}_3$ )  $\delta$  8.15 (s, 1 H), 7.96 (dd,  $J = 9.0, 4.8$  Hz, 1 H), 7.55 (dd,  $J = 8.0, 2.6$  Hz, 1 H), 7.22 (td,  $J = 9.0, 2.6$  Hz, 1 H), 2.93 (d,  $J = 7.2$  Hz, 2 H), 2.17 (hept,  $J = 13.6, 6.8$  Hz, 1 H), 1.03 (d,  $J = 6.6$  Hz, 6 H);  $^{13}\text{C}$  NMR (125 MHz,  $\text{CDCl}_3$ )  $\delta$  173.73, 160.59 (d,  $J = 246.7$  Hz), 158.22 (d,  $J = 3.6$  Hz), 150.02, 142.78, 135.45 (d,  $J = 11.3$  Hz), 131.88, 123.91 (d,  $J = 9.3$  Hz), 115.19 (d,  $J = 24.7$  Hz), 107.81 (d,  $J = 27.0$  Hz), 42.62, 29.83, 22.24; HRMS (EI):  $m/z$  Calcd. For

C<sub>14</sub>H<sub>13</sub>FN<sub>2</sub>S<sub>2</sub>: [M]<sup>+</sup>: 292.0504; Found: 292.0508.

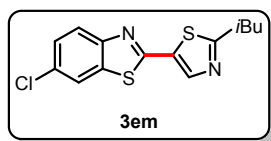

**6-Chloro-2-(2-isobutylthiazol-5-yl)benzo[d]thiazole:** As a pale yellow powder (PE:EA = 20:1 v:v); m.p. 90–91 °C; <sup>1</sup>H NMR (300 MHz, CDCl<sub>3</sub>) δ 8.17 (s, 1 H), 7.92 (dd, *J* = 8.7, 0.5 Hz, 1 H), 7.84 (dd, *J* = 2.1, 0.5 Hz, 1 H), 7.45 (dd, *J* = 8.7, 2.1 Hz, 1 H), 2.94 (d, *J* = 7.2 Hz, 2 H), 2.17 (hept, *J* = 13.6, 6.7 Hz, 1 H), 1.04 (d, *J* = 6.6 Hz, 6 H); <sup>13</sup>C NMR (125 MHz, CDCl<sub>3</sub>) δ 174.00, 158.91, 151.92, 143.04, 135.57, 131.78, 131.41, 127.35, 123.65, 121.09, 42.63, 29.83, 22.25; HRMS (EI): *m/z* Calcd. For C<sub>14</sub>H<sub>13</sub>ClN<sub>2</sub>S<sub>2</sub>: [M]<sup>+</sup>: 308.0209; Found: 308.0204.

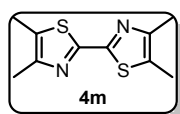

**4,4',5,5'-Tetramethyl-2,2'-bithiazole<sup>9</sup>:** As a pale yellow powder (PE:EA = 40:1 v:v); <sup>1</sup>H NMR (300 MHz, CDCl<sub>3</sub>) δ 2.39 (q, *J* = 0.8 Hz, 6 H), 2.36 (q, *J* = 0.7 Hz, 6 H); LRMS (ESI): *m/z* 225 [M+H]<sup>+</sup>.

#### The H/D exchange experiment for **1a**

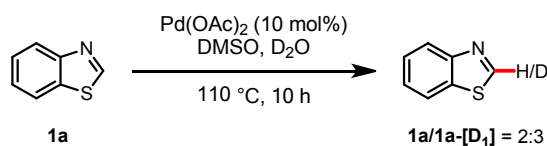

To a solution of **1a** (1.0 mmol, 1.0 equiv) in DMSO (2.0 mL), Pd(OAc)<sub>2</sub> (10 mol%) and D<sub>2</sub>O (1.0 mL) was added, and the mixture was heated at 110 °C for 10 h. After cooling, the reaction solution was washed with saturated brine and extracted with ethyl acetate three times. The combined organic fractions were dried over anhydrous Na<sub>2</sub>SO<sub>4</sub> and concentrated under vacuum to yield the crude product. **1a-[D<sub>1</sub>]** was detected by LC-MS, and the ratio of **1a** and **1a-[D<sub>1</sub>]** was determined by <sup>1</sup>H NMR analysis of the crude product.

Print of window 80: MS Spectrum

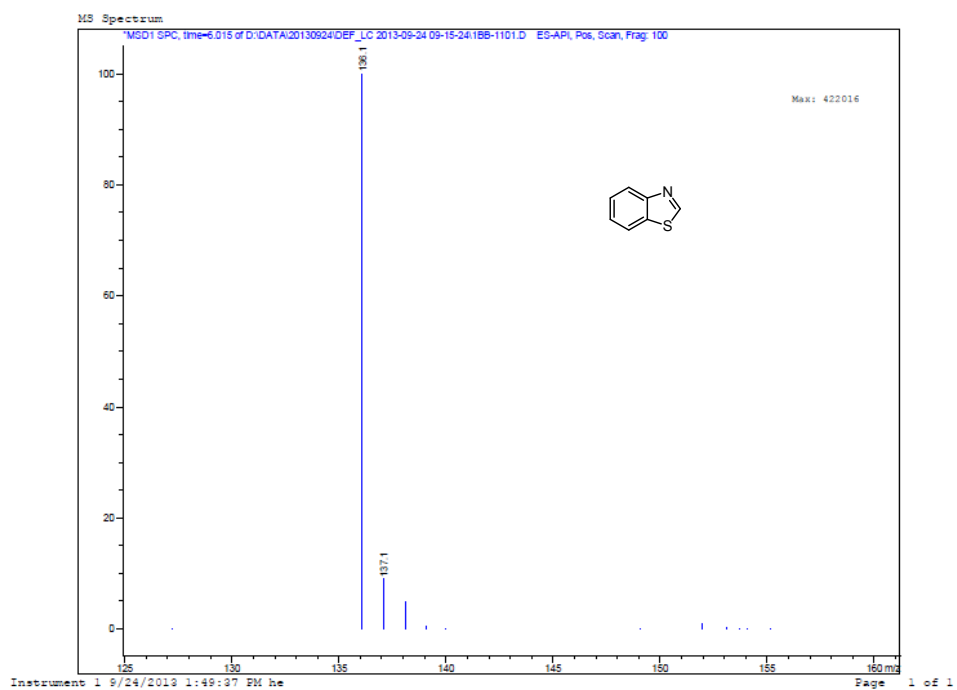

Copy of low-resolution mass spectrum (ESI) of **1a**

Print of window 80: MS Spectrum

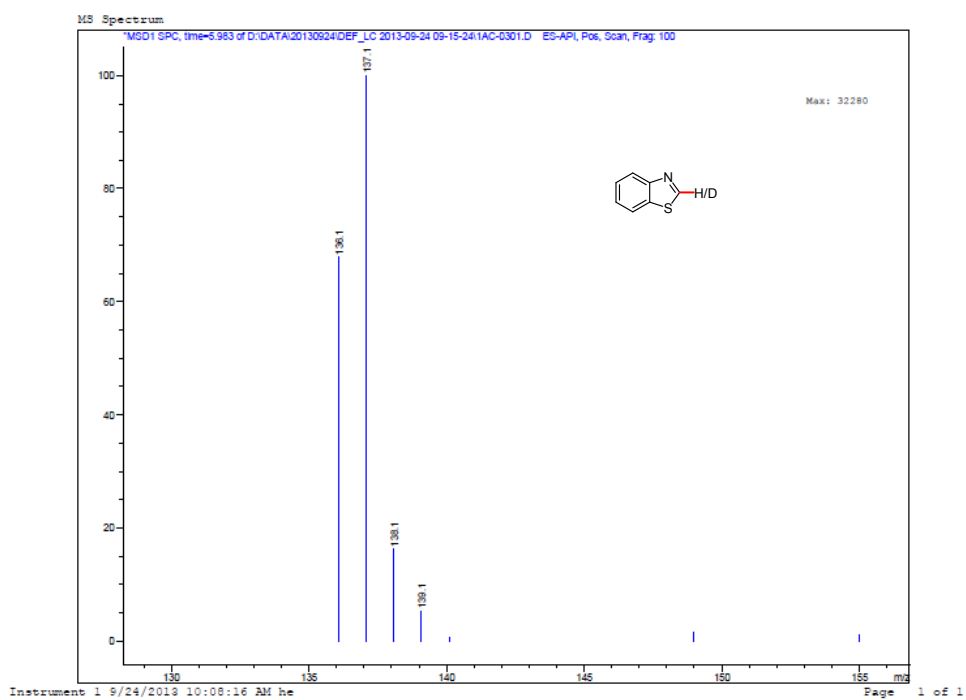

Copy of low-resolution mass spectrum (ESI) of the crude product

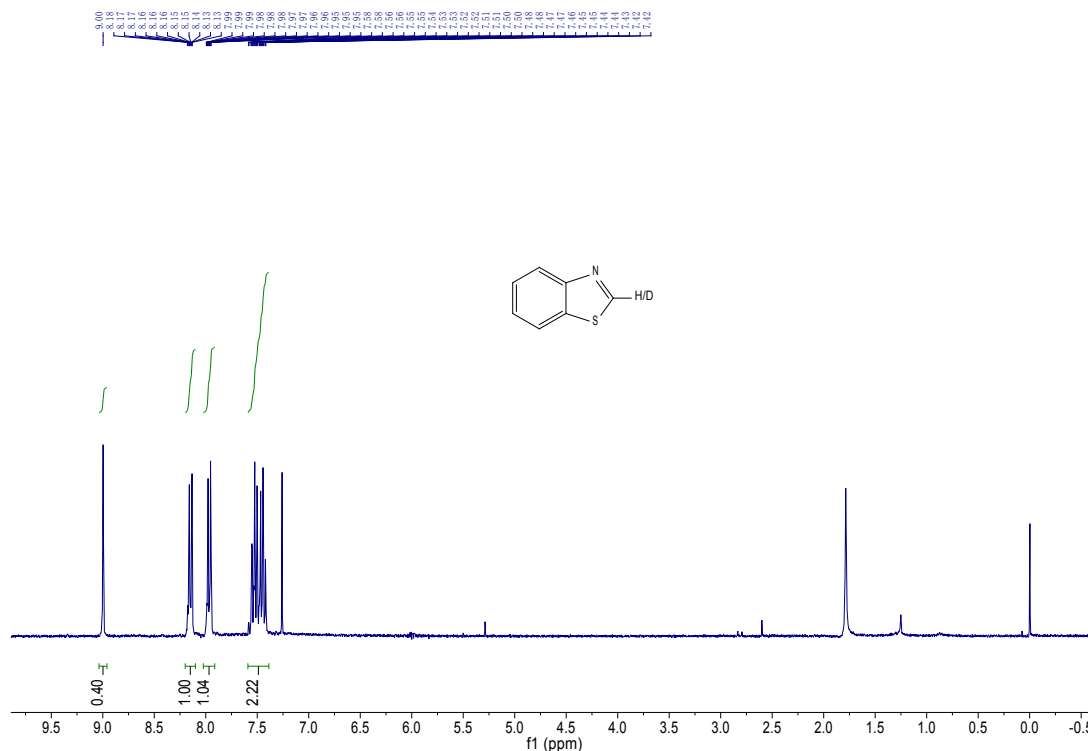

$^1\text{H}$  NMR spectrum of the crude product

### Kinetic isotope experiments

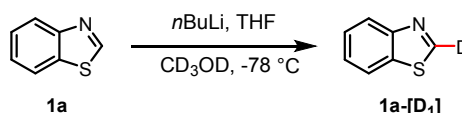

**Preparation of 2-deutero-benzothiazole (1a-[D<sub>1</sub>])**<sup>10</sup>: A stirred solution of benzothiazole **1a** (10 mmol) in dry THF (10 mL) under nitrogen was cooled to  $-78\text{ }^\circ\text{C}$  and 12 mmol *n*BuLi in hexane was added dropwise. 2-Lithiobenzothiazole was immediately formed. This orange-colored anion solution was quickly quenched at  $-78\text{ }^\circ\text{C}$  with  $\text{CD}_3\text{OD}$  (1.0 mL) after the addition of *n*BuLi. The suspension was extracted with water and ethyl acetate three times. The combined organic layers were dried over anhydrous  $\text{Na}_2\text{SO}_4$  and evaporated in vacuum. After purification by column chromatography on silica gel with petroleum ether /ethyl acetate (PE:EA = 20:1 v:v), the desired products were obtained in 95% yield as pale yellow oil;  $^1\text{H}$  NMR (300 MHz,  $\text{CDCl}_3$ )  $\delta$  8.15 (ddd,  $J = 7.9, 1.3, 0.7\text{ Hz}$ , 1 H), 7.97 (ddd,  $J = 7.9, 1.4, 0.7\text{ Hz}$ , 1 H), 7.57–7.49 (m, 1 H), 7.48–7.41 (m, 1 H); MS (ESI):  $m/z$  137  $[\text{M}+\text{H}]^+$ .

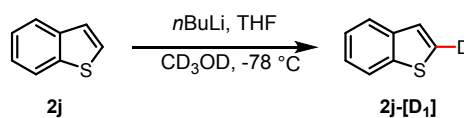

**Preparation of 2-deutero-benzothiophene (2j-[D<sub>1</sub>)]<sup>11</sup>:** A stirred solution of benzothiophene **2j** (10 mmol) in dry THF (10 mL) under nitrogen was cooled to -78 °C and 12 mmol *n*BuLi in hexane was added dropwise. CD<sub>3</sub>OD (1.0 mL) was added to the reaction system after reacting for 1 h. The suspension was extracted with water extracted with ethyl acetate three times. The combined organic layers were dried over anhydrous Na<sub>2</sub>SO<sub>4</sub> and evaporated in vacuum. After purification by column chromatography on silica gel with petroleum ether /ethyl acetate (PE:EA = 20:1 v:v), the desired products were obtained in 97% yield as colorless oil which solidified at room temperature; <sup>1</sup>H NMR (300 MHz, CDCl<sub>3</sub>) δ 7.92–7.79 (m, 2 H), 7.41–7.30 (m, 3 H); MS (EI): m/z 135 [M]<sup>+</sup>.

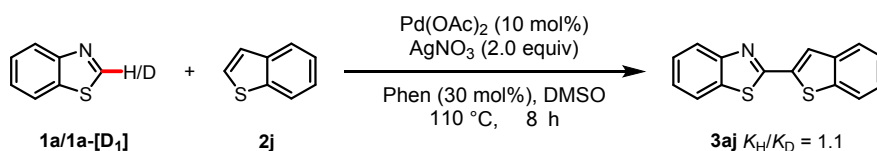

Two sets of reactions were carried out in a parallel manner. In each case benzothiophene **2j** (4.0 mmol) was allowed to react with benzothiazole **1a** (1.0 mmol) and 2-deutero-benzothiazole **1a-[D<sub>1</sub>]** (1.0 mmol), respectively. The sealed tubes were screw capped and heated to 110 °C. After being stirred for 8 h, the reaction mixture was cooled to room temperature, diluted with 20 mL of CH<sub>2</sub>Cl<sub>2</sub>, filtered through a celite pad, washed with 80 mL of CH<sub>2</sub>Cl<sub>2</sub>. The combined organic extracts were concentrated. The yield of **3aj** was determined by LC-MS.

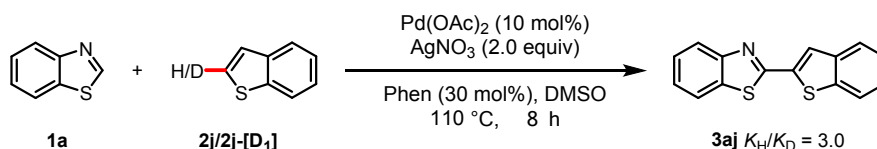

Two sets of reactions were carried out in a parallel manner. In each case benzothiazole **1a** (4.0 mmol) was allowed to react with benzothiophene **2j** (1.0 mmol) and 2-deutero-benzothiophene **2j-[D<sub>1</sub>]** (1.0 mmol), respectively. The sealed tubes were screw capped and heated to 110 °C. After being stirred for 8 h, the reaction mixture was cooled to room temperature, diluted with 20 mL of CH<sub>2</sub>Cl<sub>2</sub>, filtered through a celite pad, washed with 80 mL of CH<sub>2</sub>Cl<sub>2</sub>. The combined organic extracts were concentrated. The yield of **3aj** was determined by LC-MS.

## References

1. S. P. Costa, A. M. Oliveira-Campos, J. A. Ferreira and G. Kirsch, *J. Chem. Res. (S)*, 1997, 314.

2. F. Derridj, A. L. Gottumukkala, S. Djebbar and H. Doucet, *Eur. J. Inorg. Chem.*, 2008, **2008**, 2550.
3. C. Siddappa, V. Kambappa, M. Umashankara and K. S. Rangappa, *Tetrahedron Lett.*, 2011, **52**, 5474.
4. A. A. Aleksandrov and M. M. El'chaninov, *Russ. J. Appl. Chem.*, 2010, **83**, 1602.
5. A. E. Siegrist, E. Maeder, P. Liechti and L. Guglielmetti, **1966**, US3268543.
6. M. A. Oberli and S. L. Buchwald, *Org. Lett.*, 2012, **14**, 4606.
7. V. M. Zubarovskii, *Zh. Obshch. Khim.*, 1959, **29**, 2018.
8. L. C. Bencze, C. Paizs, M. I. Tosa, M. Trif and F. D. Irimie, *Tetrahedron: Asymmetry*, 2010, **21**, 1999.
9. W. Han, P. Mayer and A. R. Ofial, *Angew. Chem. Int. Edit.*, 2011, **50**, 2178.
10. Q. Liu, P. Wu, Y. Yang, Z. Zeng, J. Liu, H. Yi and A. Lei, *Angew. Chem. Int. Edit.*, 2012, **51**, 4666.
11. N. Kuhl, M. N. Hopkinson and F. Glorius, *Angew. Chem. Int. Edit.*, 2012, **51**, 8230.





**3ab**

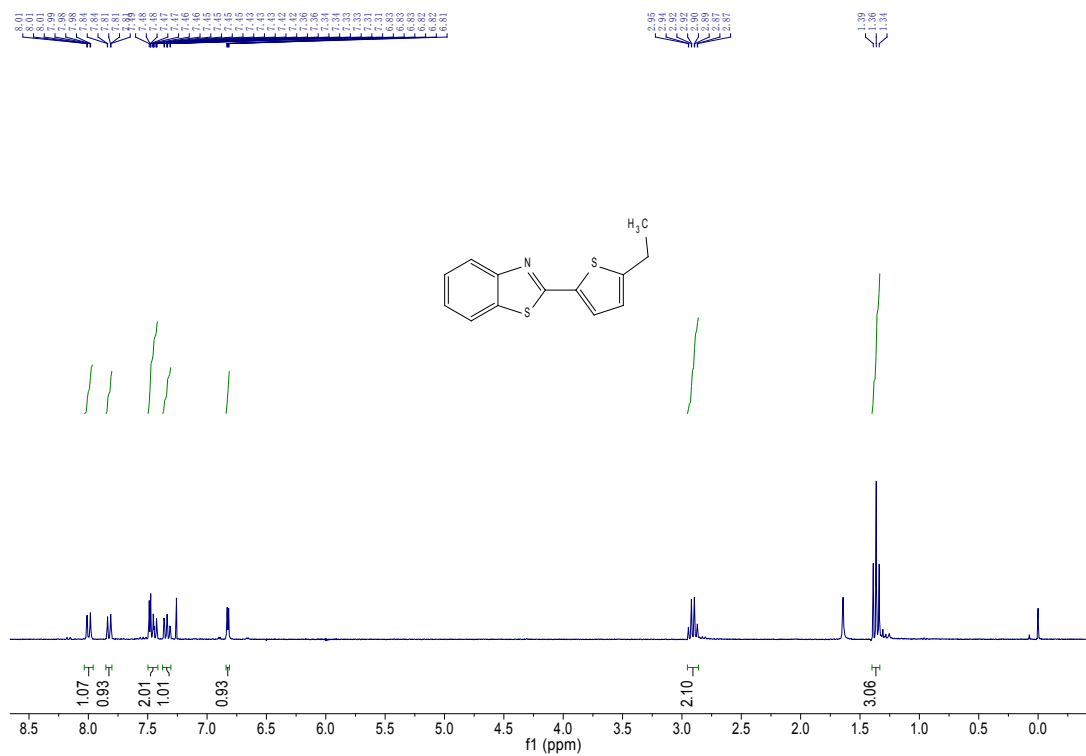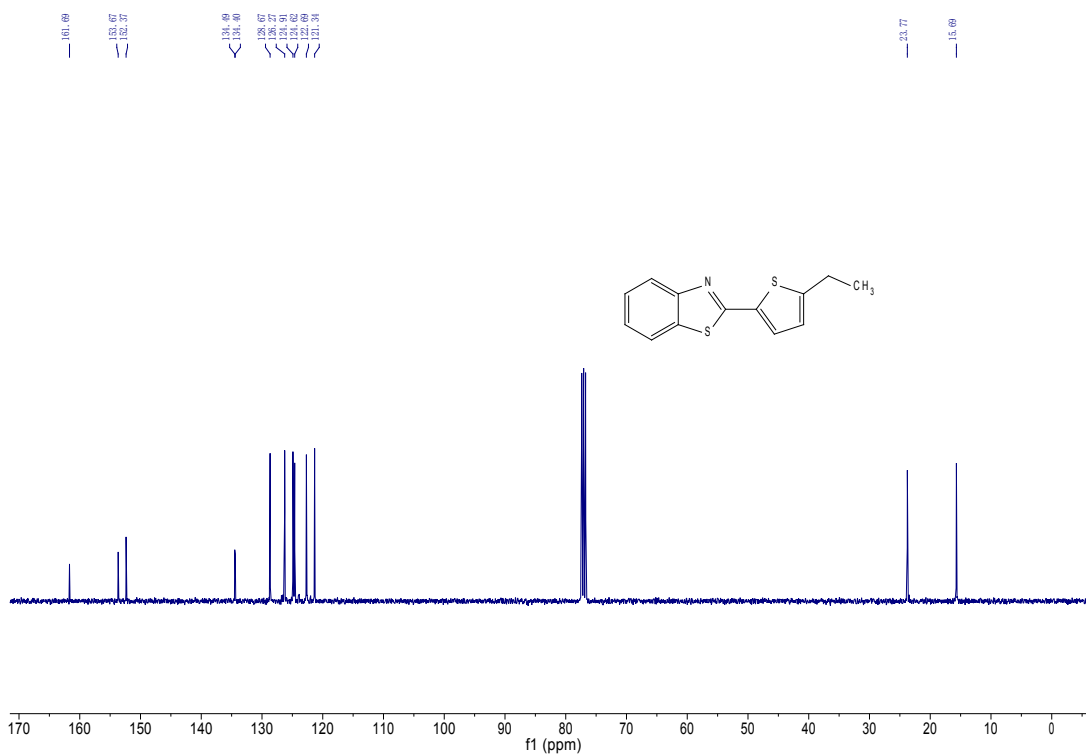

3ac

8.02  
7.99  
7.98  
7.97  
7.96  
7.95  
7.94  
7.93  
7.92  
7.91  
7.90  
7.89  
7.88  
7.87  
7.86  
7.85  
7.84  
7.83  
7.82  
7.81  
7.80  
7.79  
7.78  
7.77  
7.76  
7.75  
7.74  
7.73  
7.72  
7.71  
7.70  
7.69  
7.68  
7.67  
7.66  
7.65  
7.64  
7.63  
7.62  
7.61  
7.60  
7.59  
7.58  
7.57  
7.56  
7.55  
7.54  
7.53  
7.52  
7.51  
7.50  
7.49  
7.48  
7.47  
7.46  
7.45  
7.44  
7.43  
7.42  
7.41  
7.40  
7.39  
7.38  
7.37  
7.36  
7.35  
7.34  
7.33  
7.32  
7.31  
7.30  
7.29  
7.28  
7.27  
7.26  
7.25  
7.24  
7.23  
7.22  
7.21  
7.20  
7.19  
7.18  
7.17  
7.16  
7.15  
7.14  
7.13  
7.12  
7.11  
7.10  
7.09  
7.08  
7.07  
7.06  
7.05  
7.04  
7.03  
7.02  
7.01  
7.00  
6.99  
6.98  
6.97  
6.96

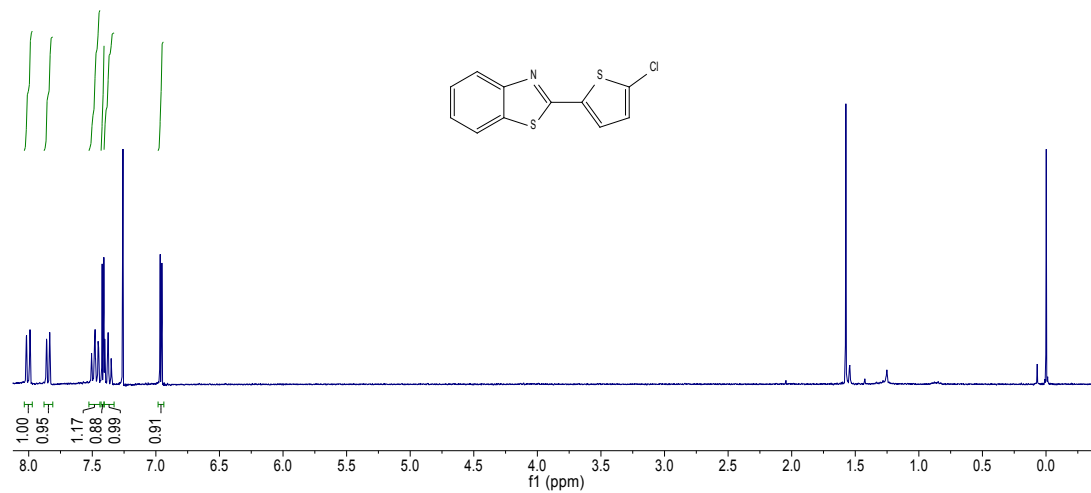

160.28  
151.41  
135.79  
134.38  
127.62  
126.72  
125.90  
125.71  
124.74

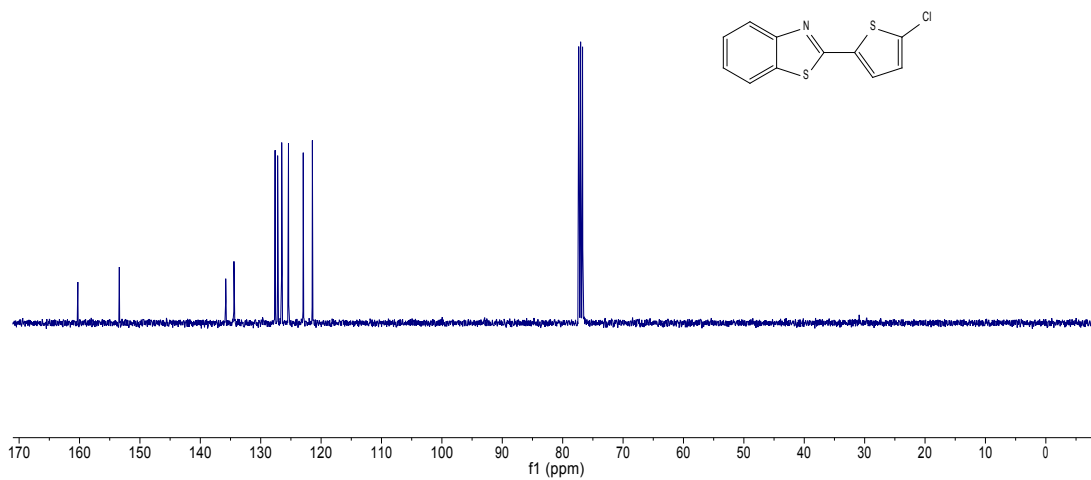



3ae

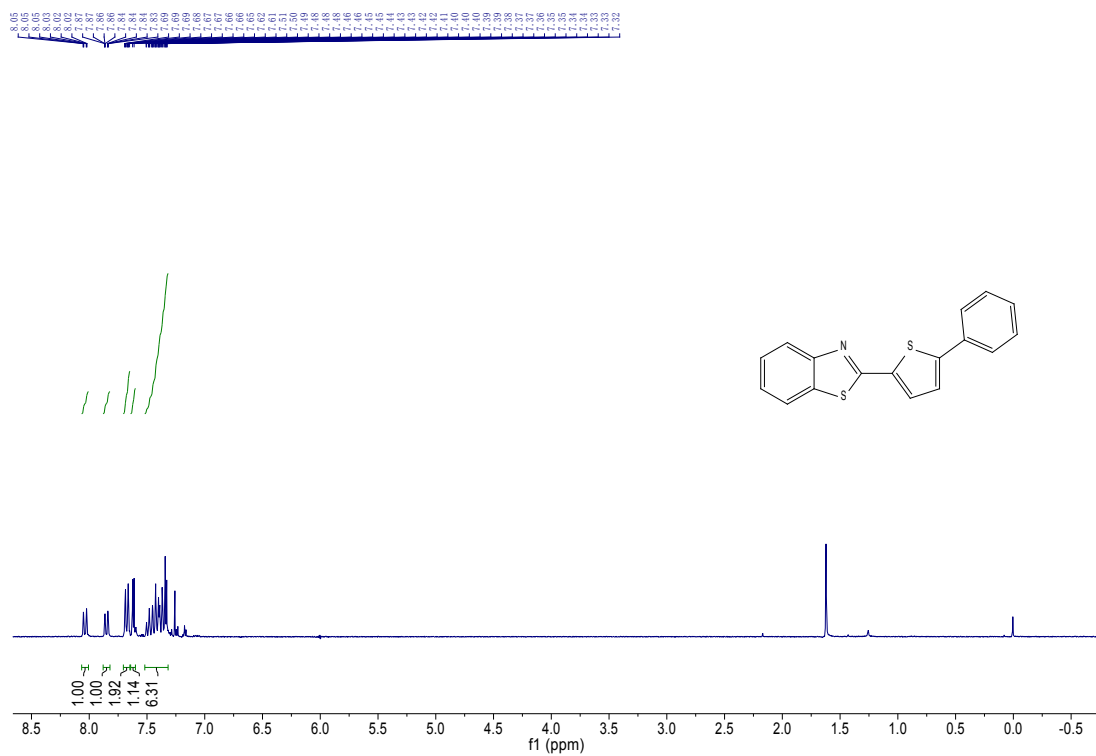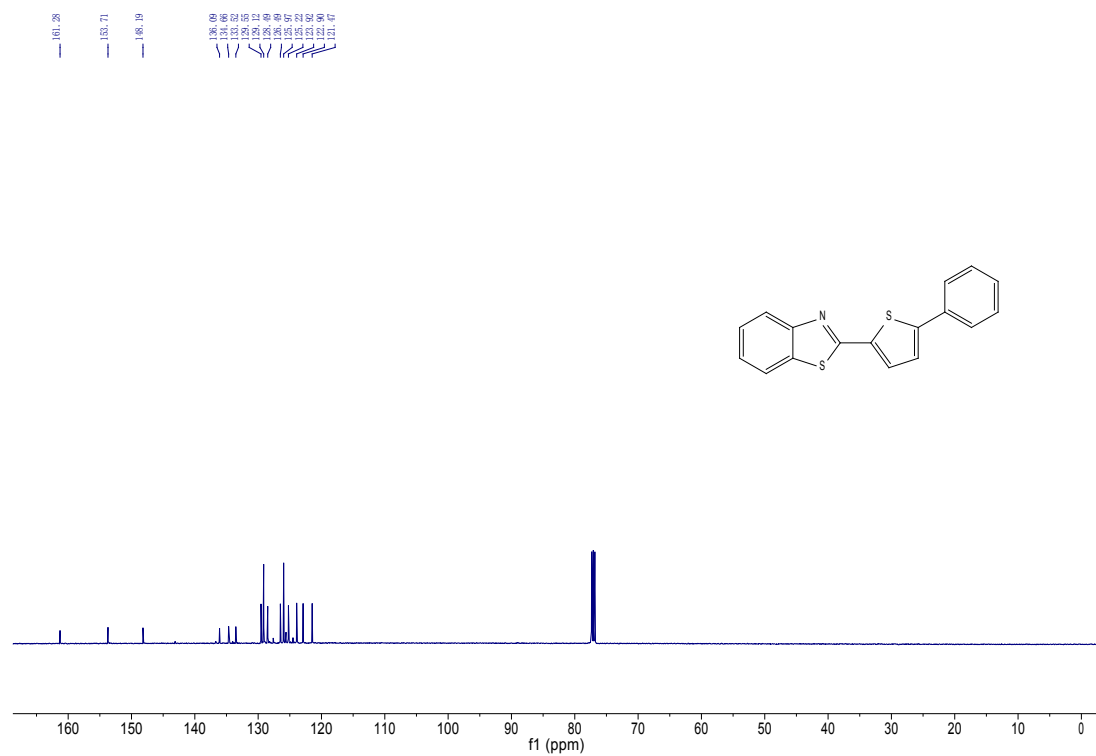

3af

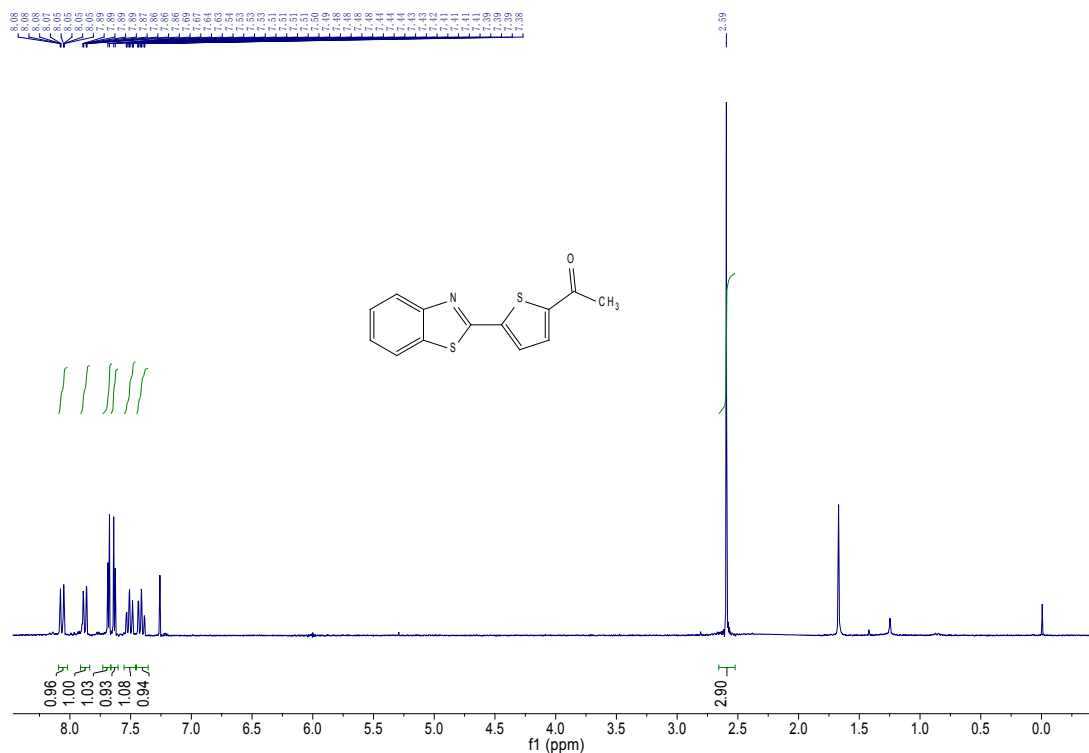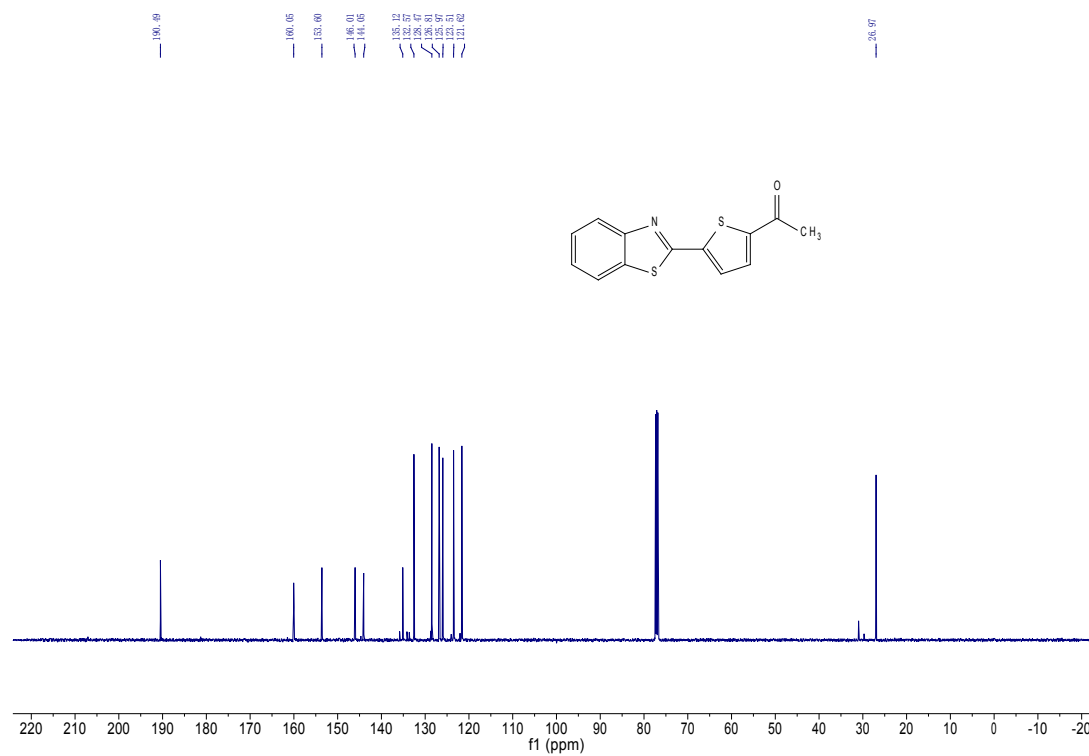

3ag

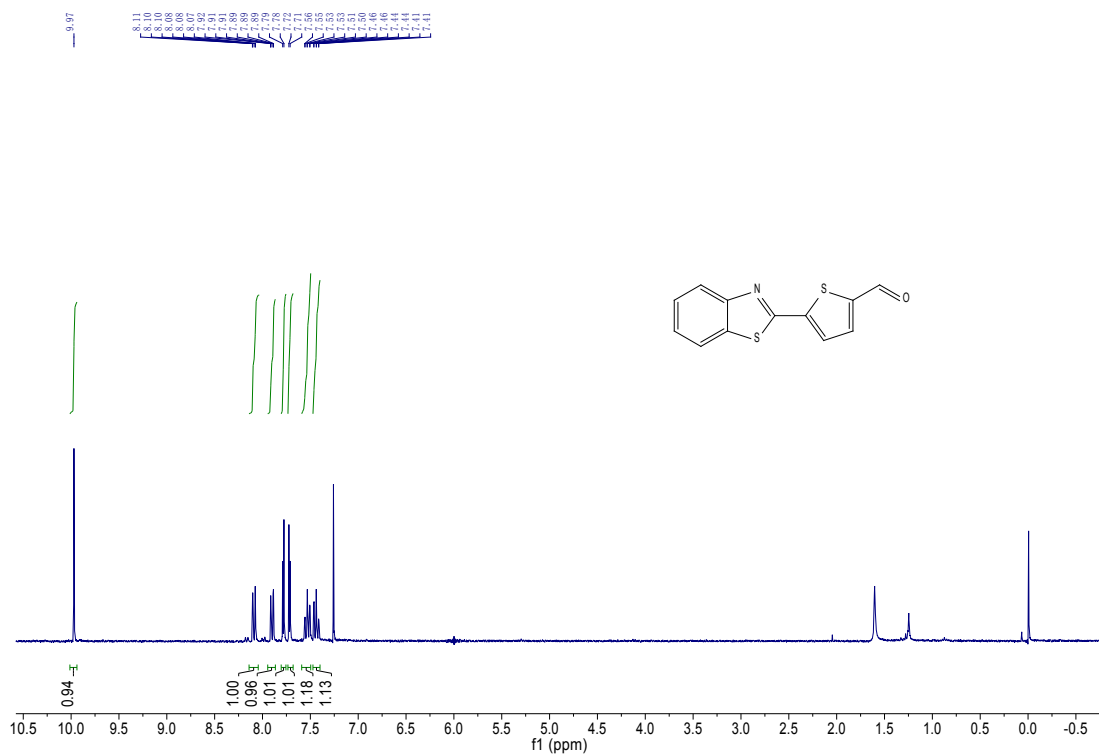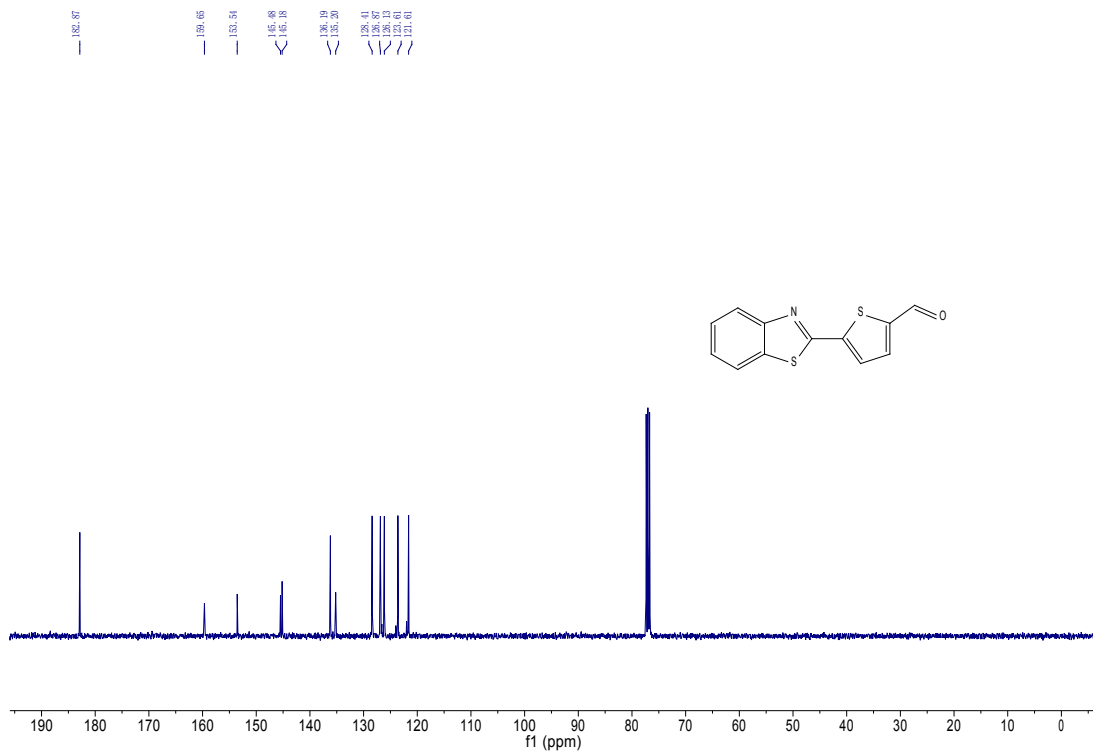

### 3ah

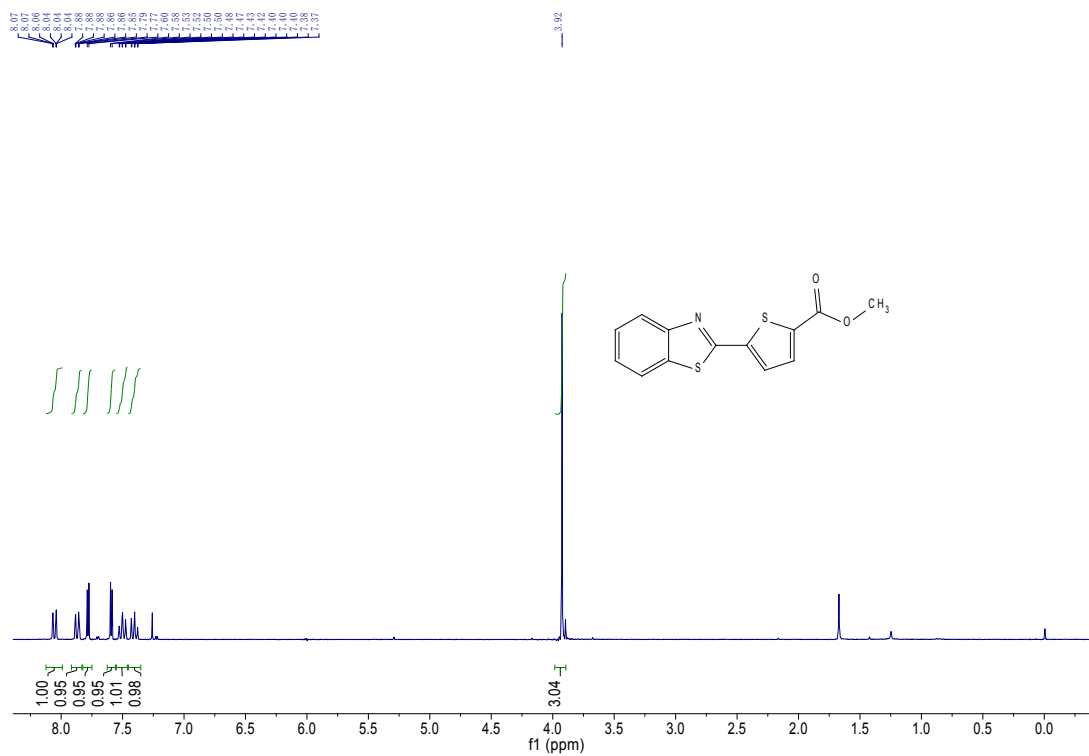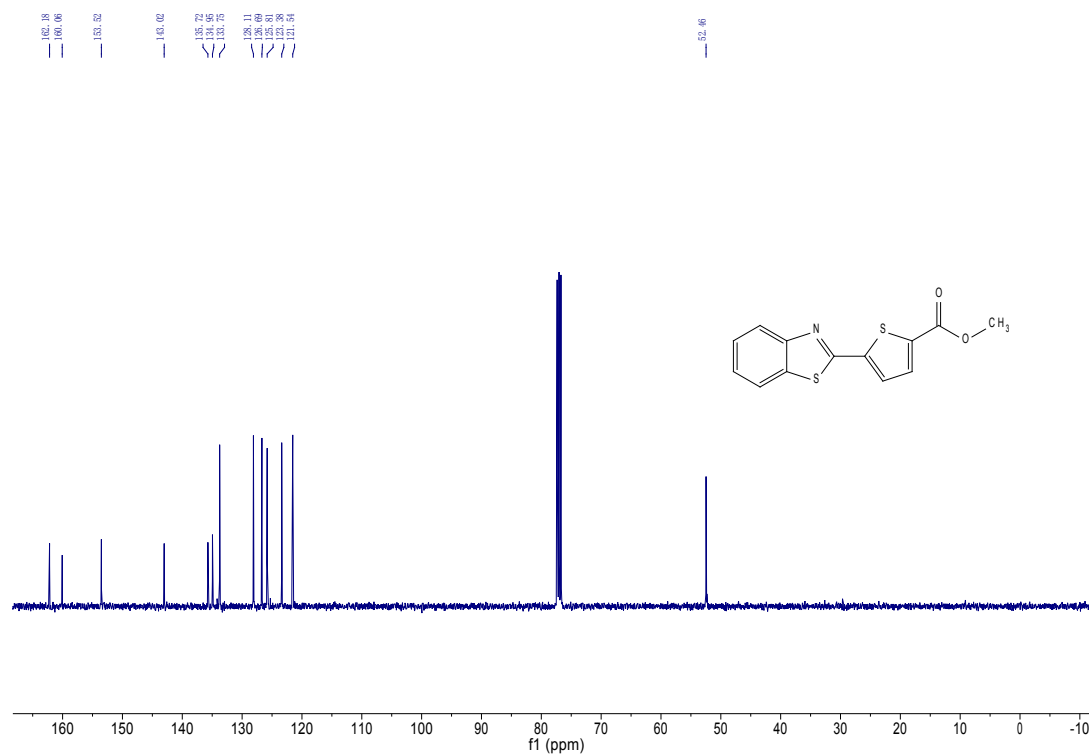



3ai

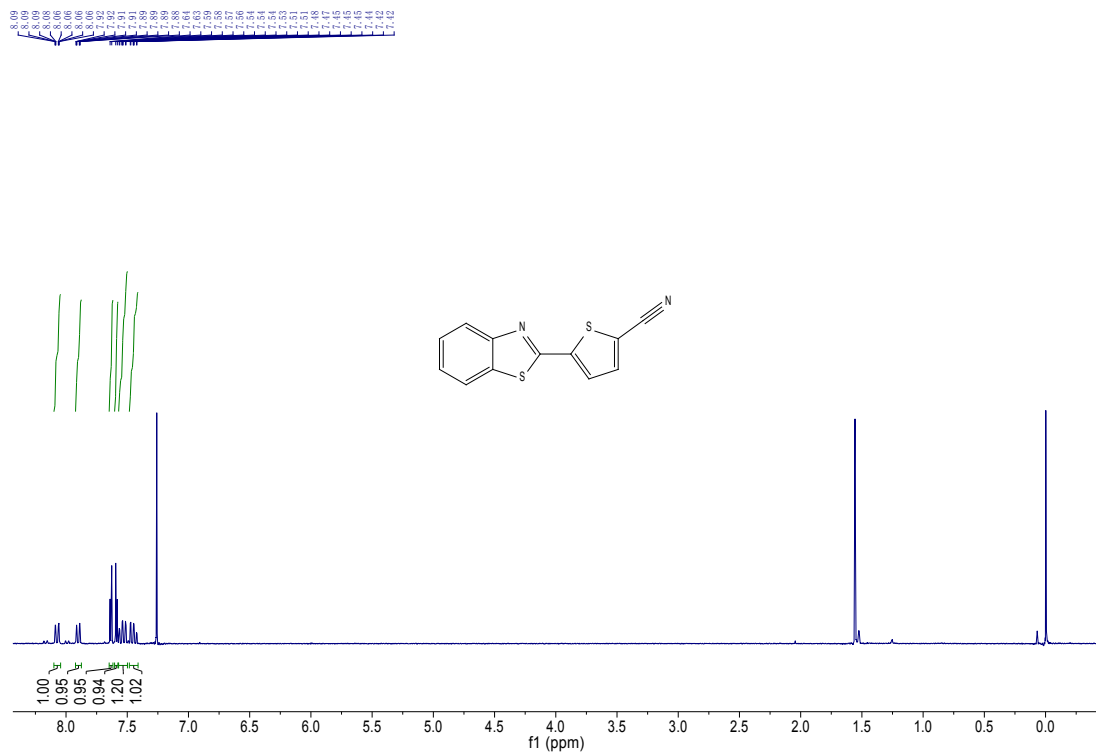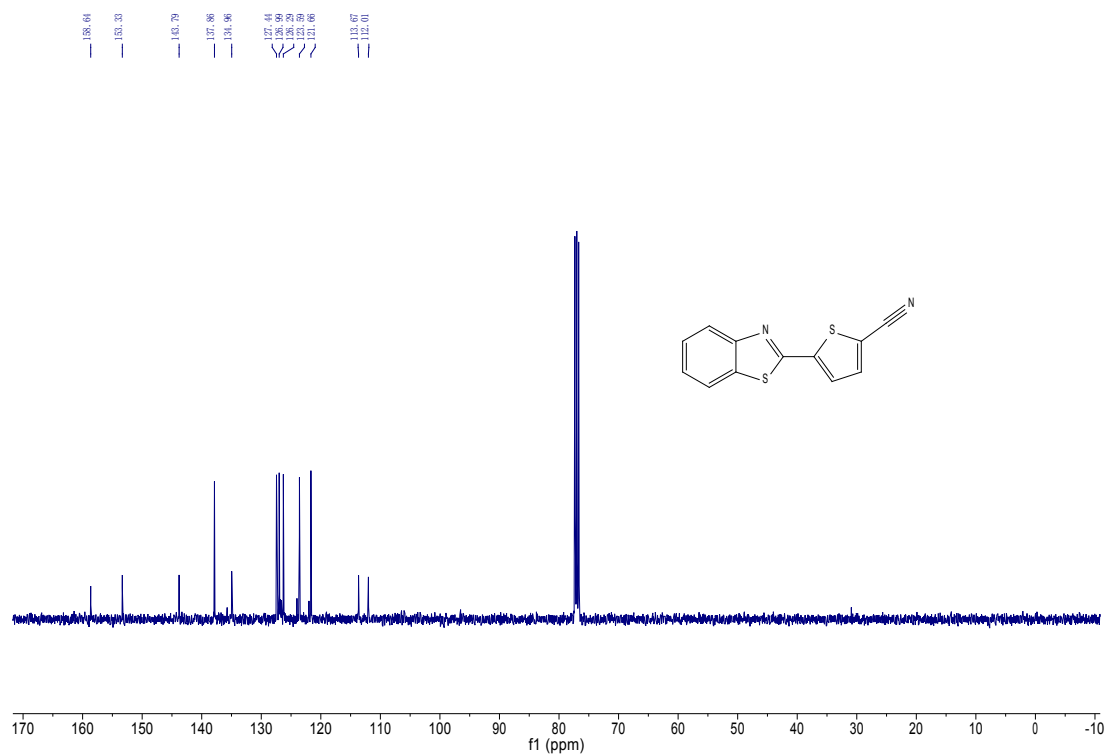

3aj

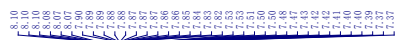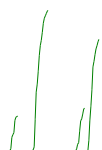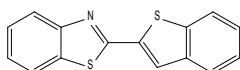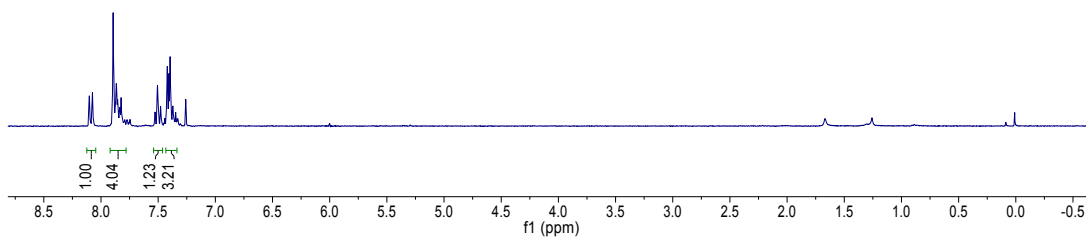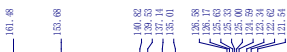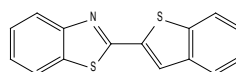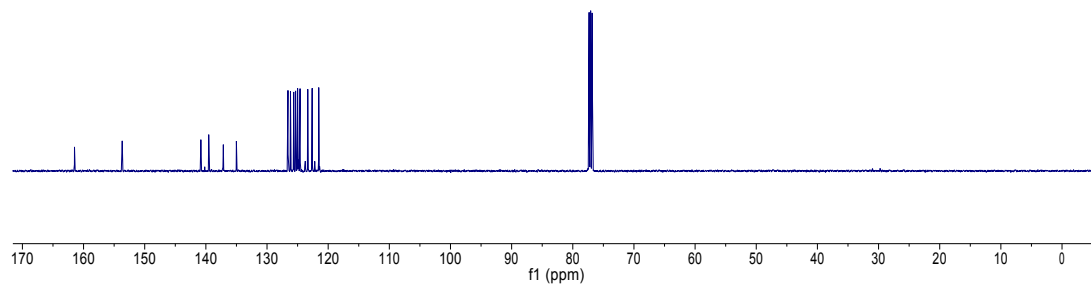

3ak

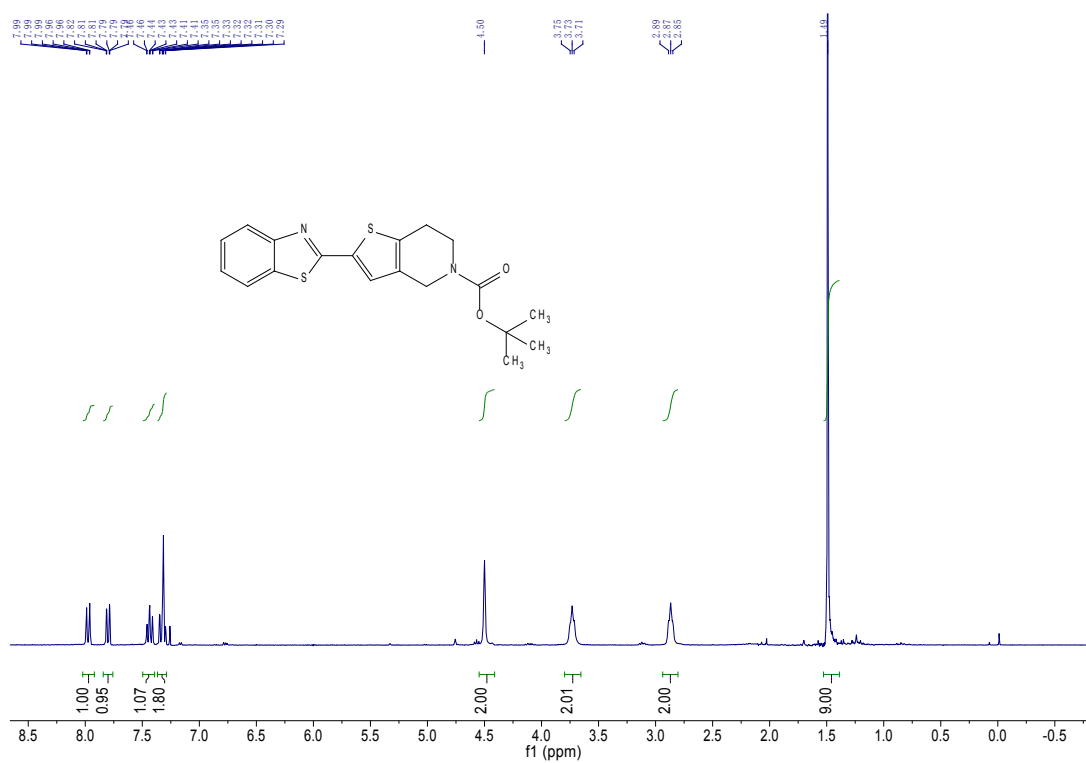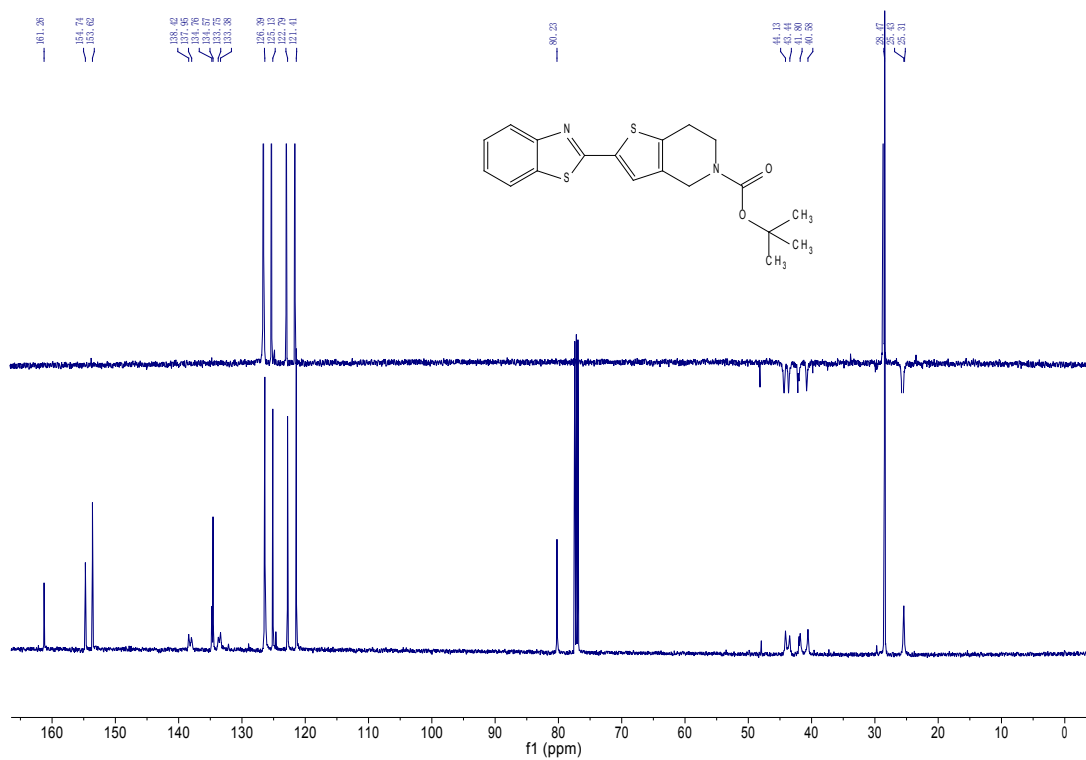

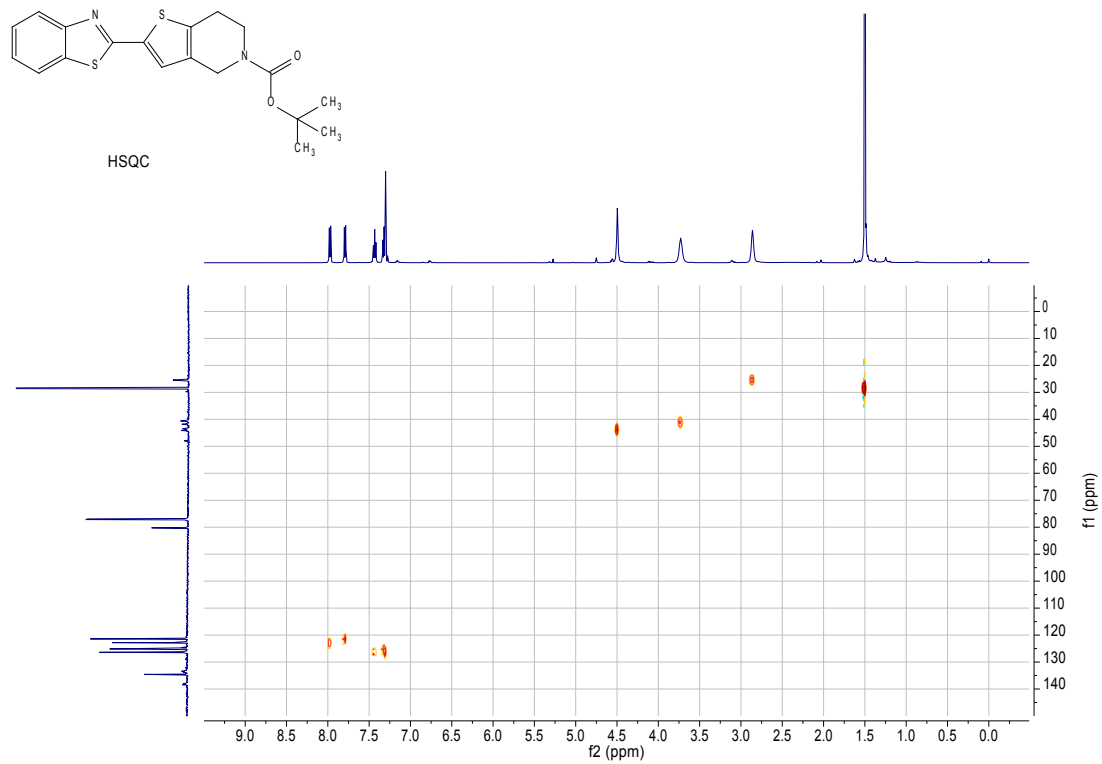

3al

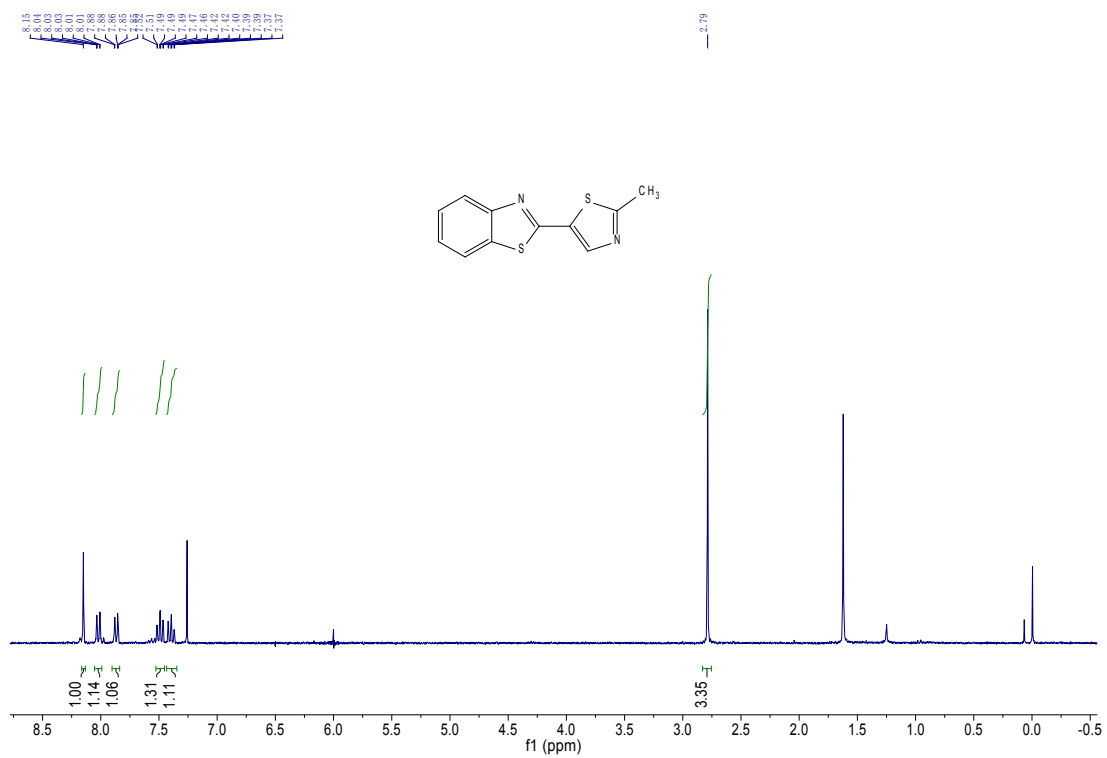



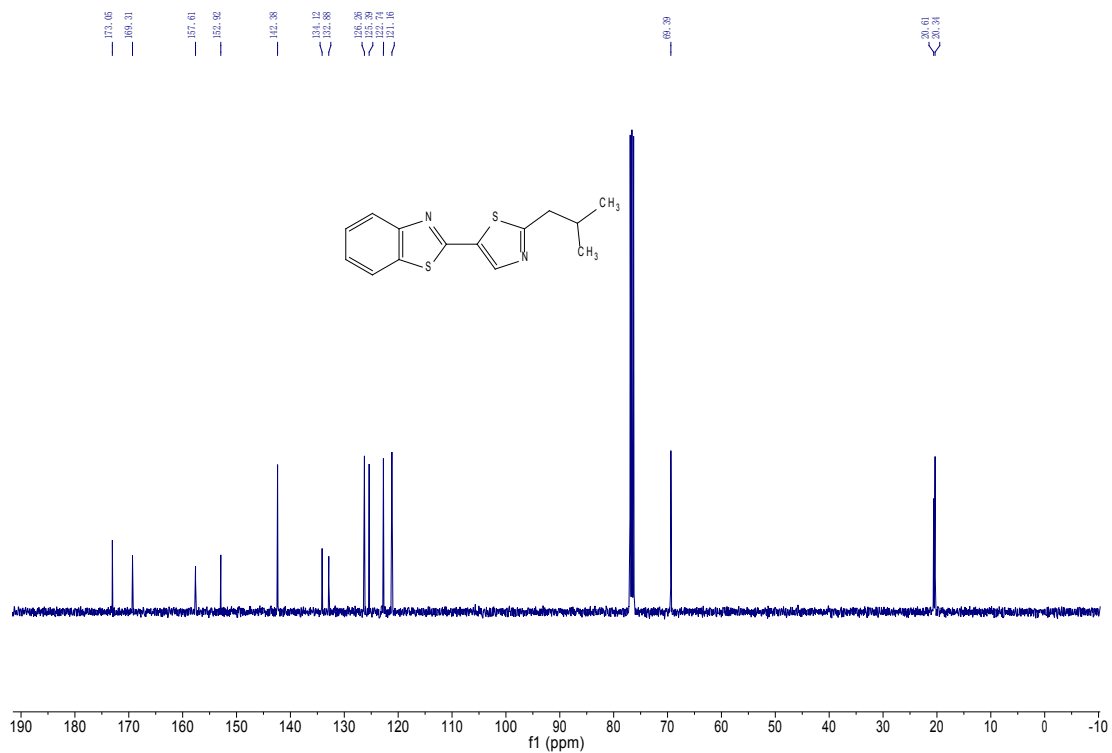

### 3an

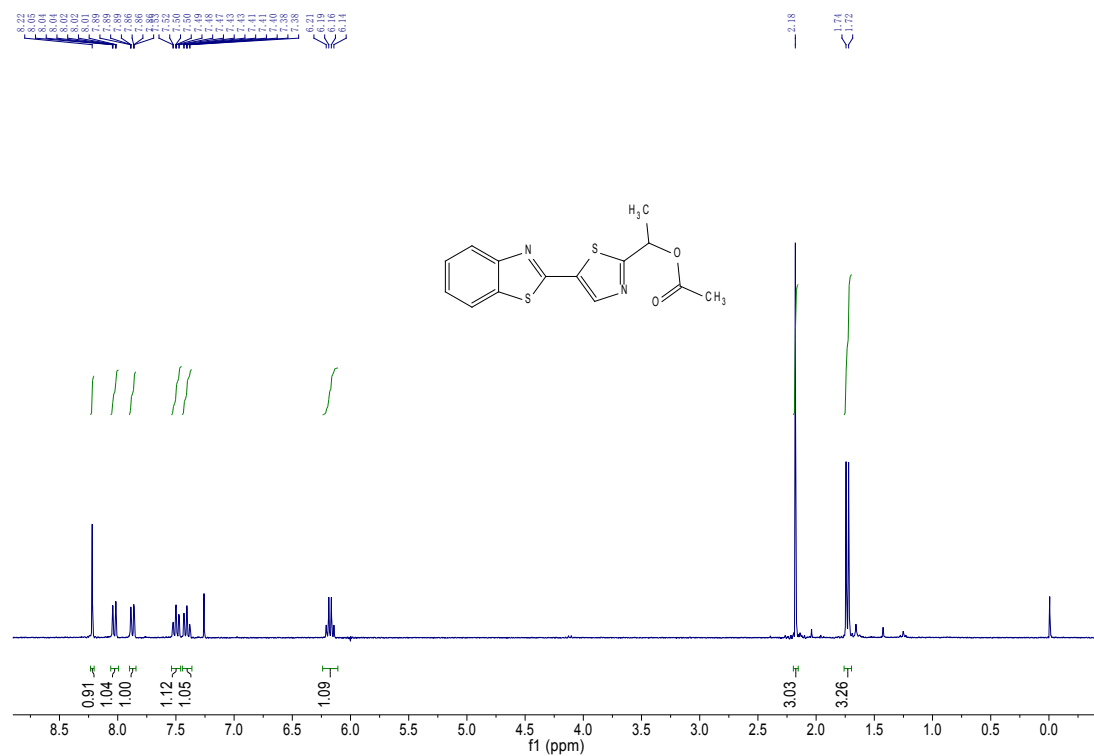



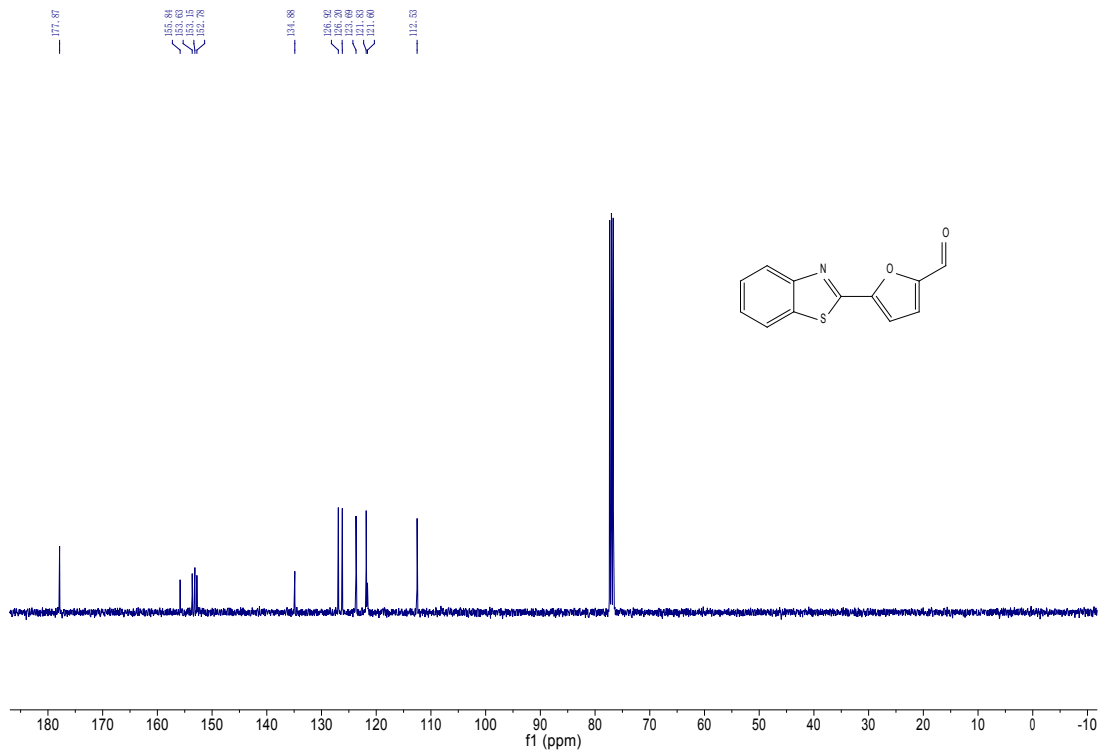

**3bb**

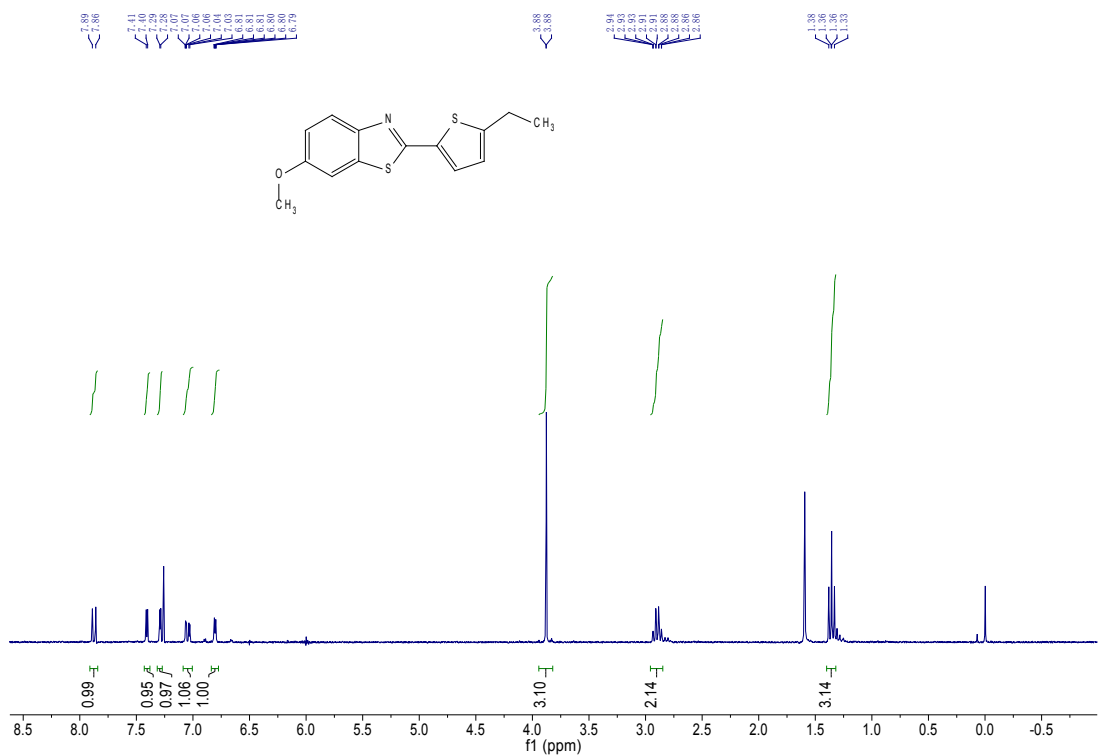



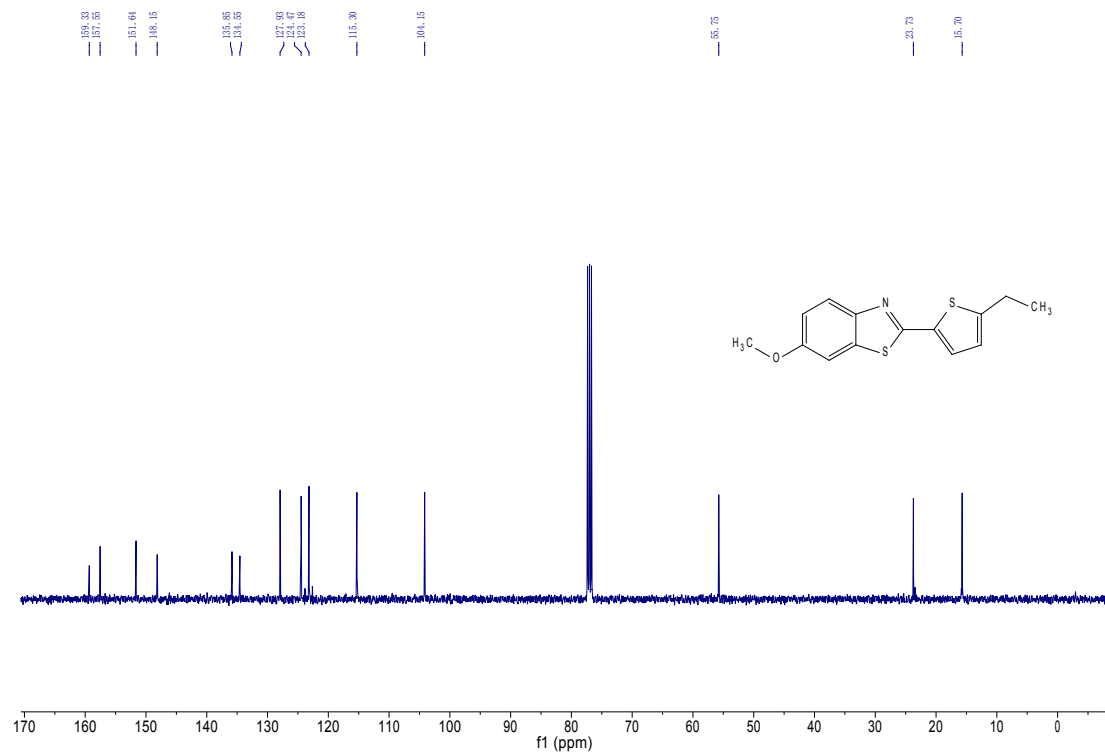

### 3b

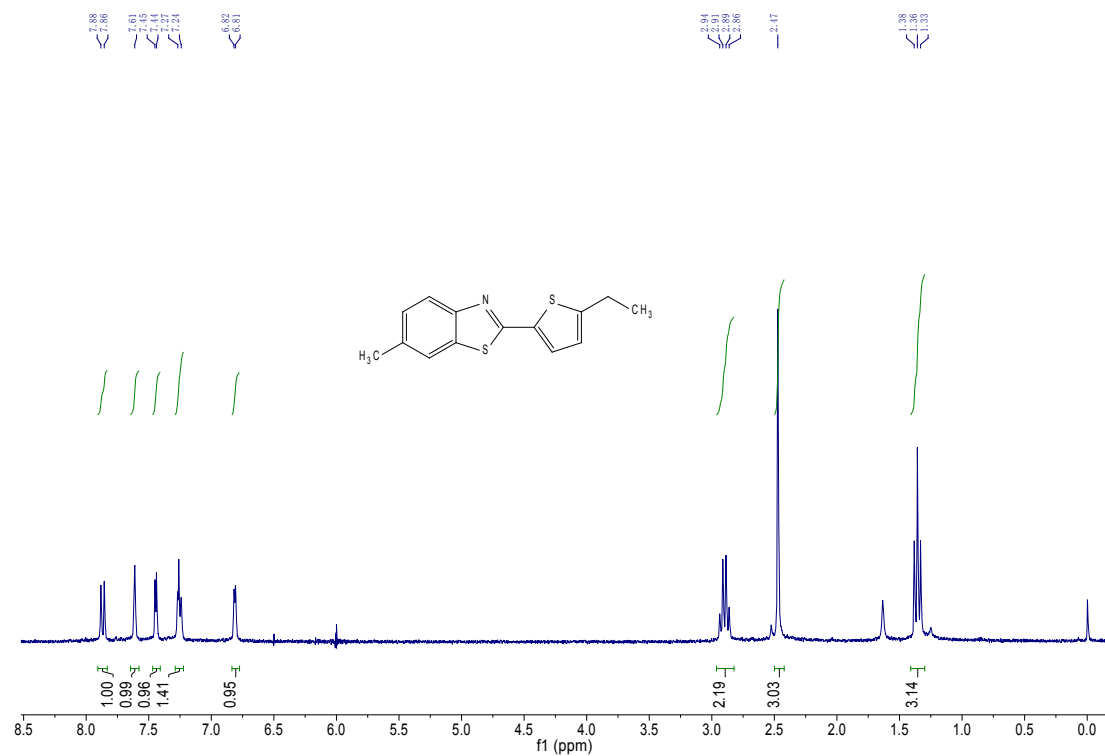

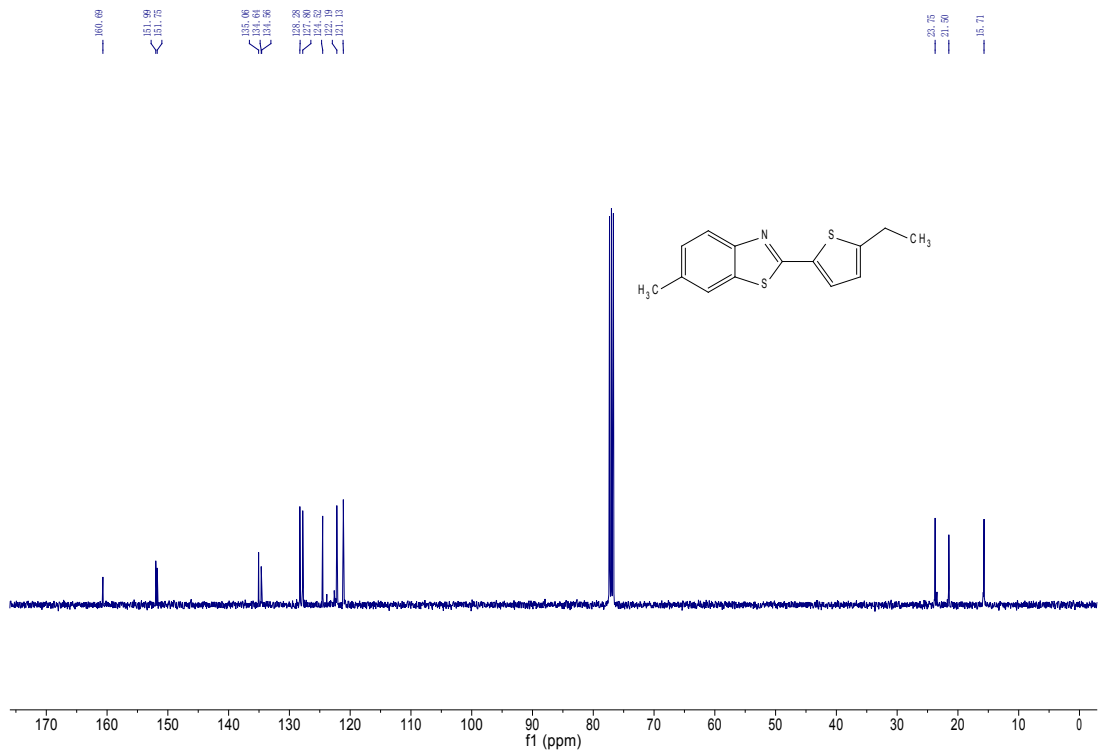

### 3db

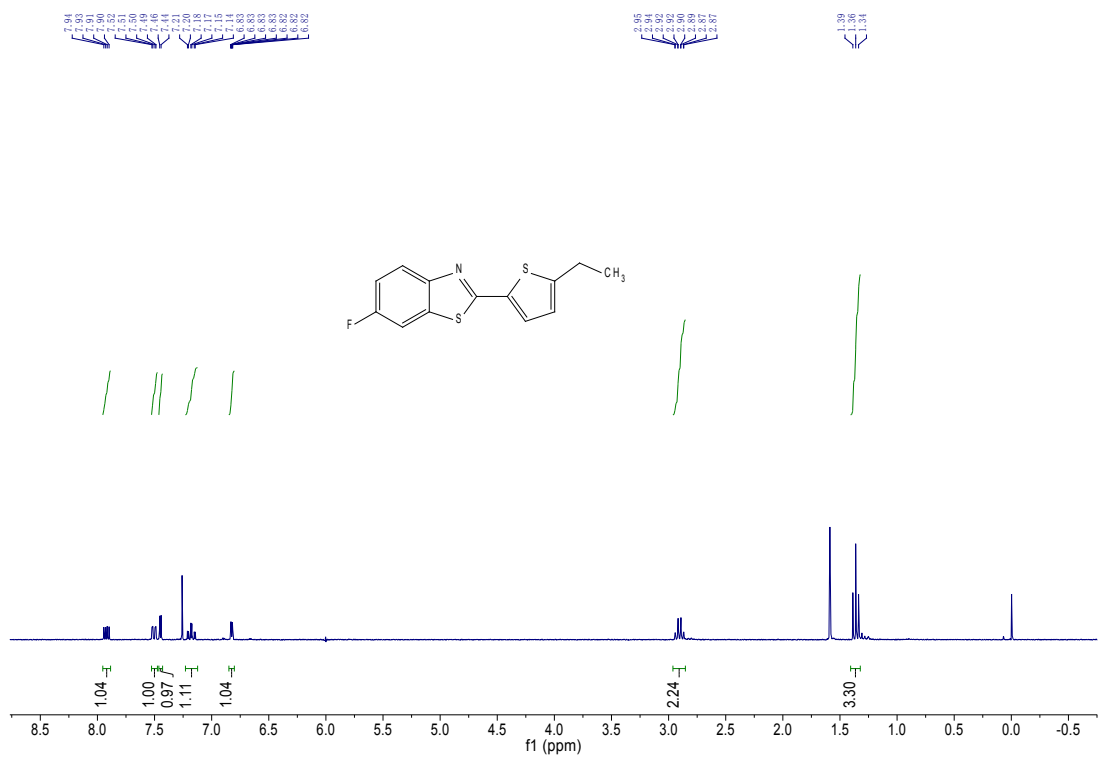

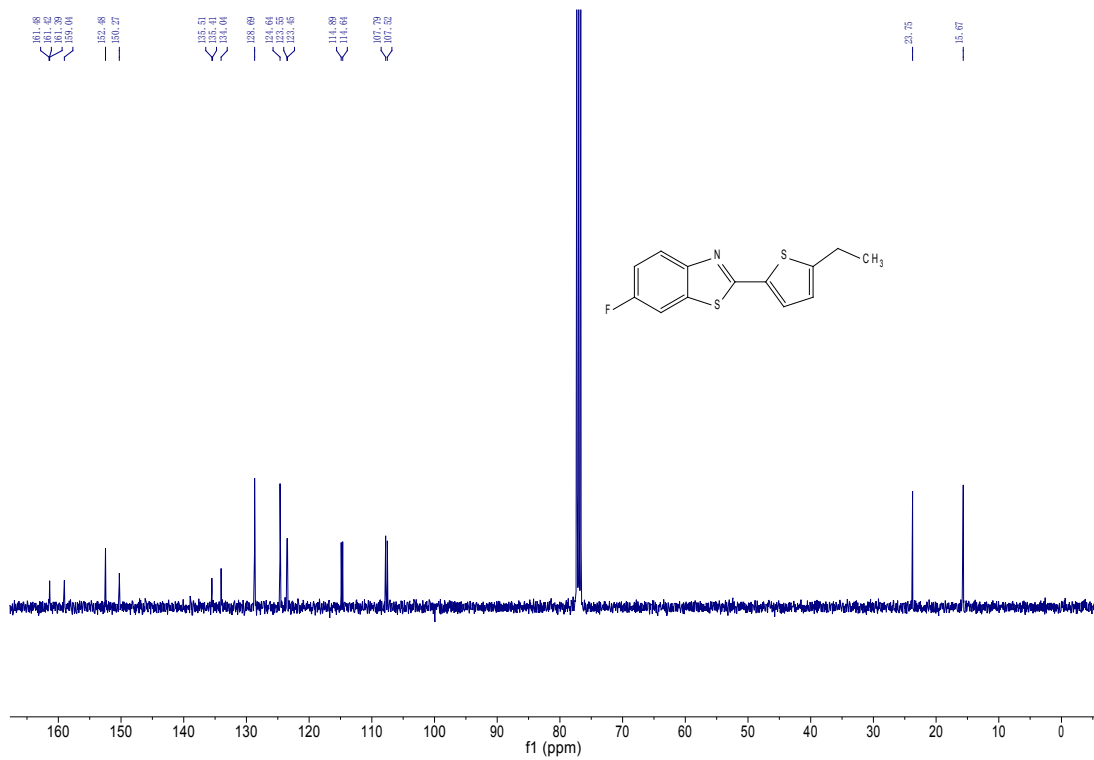

**3eb**

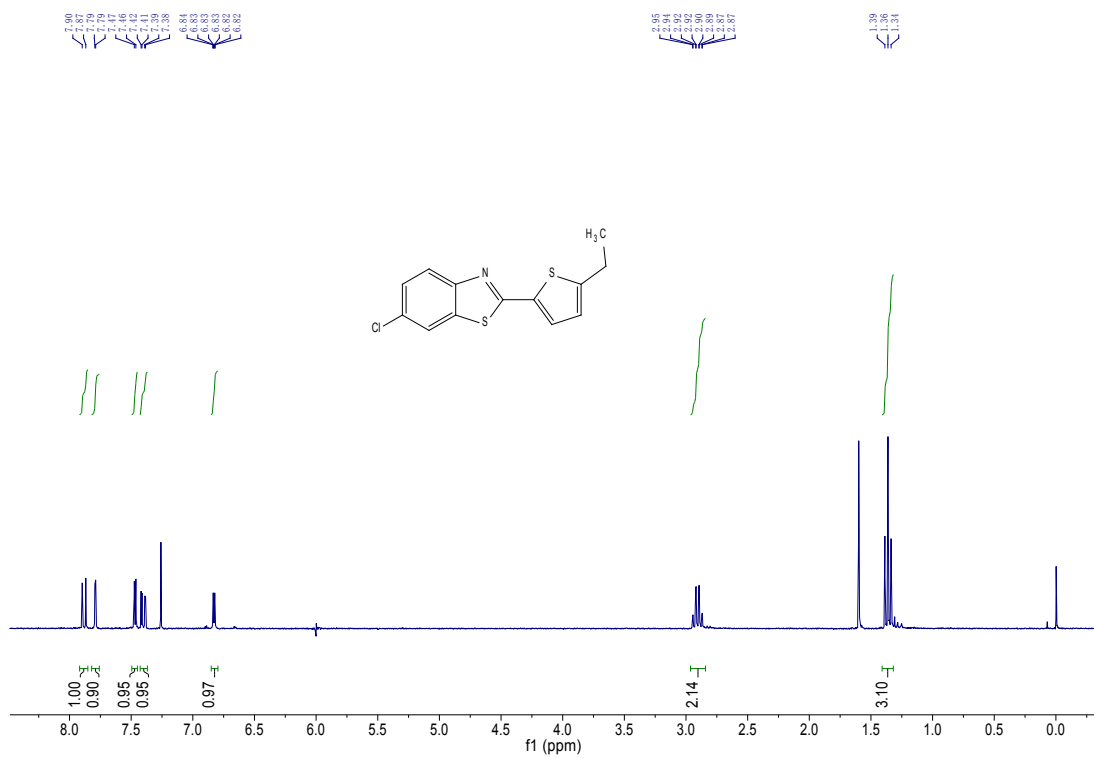

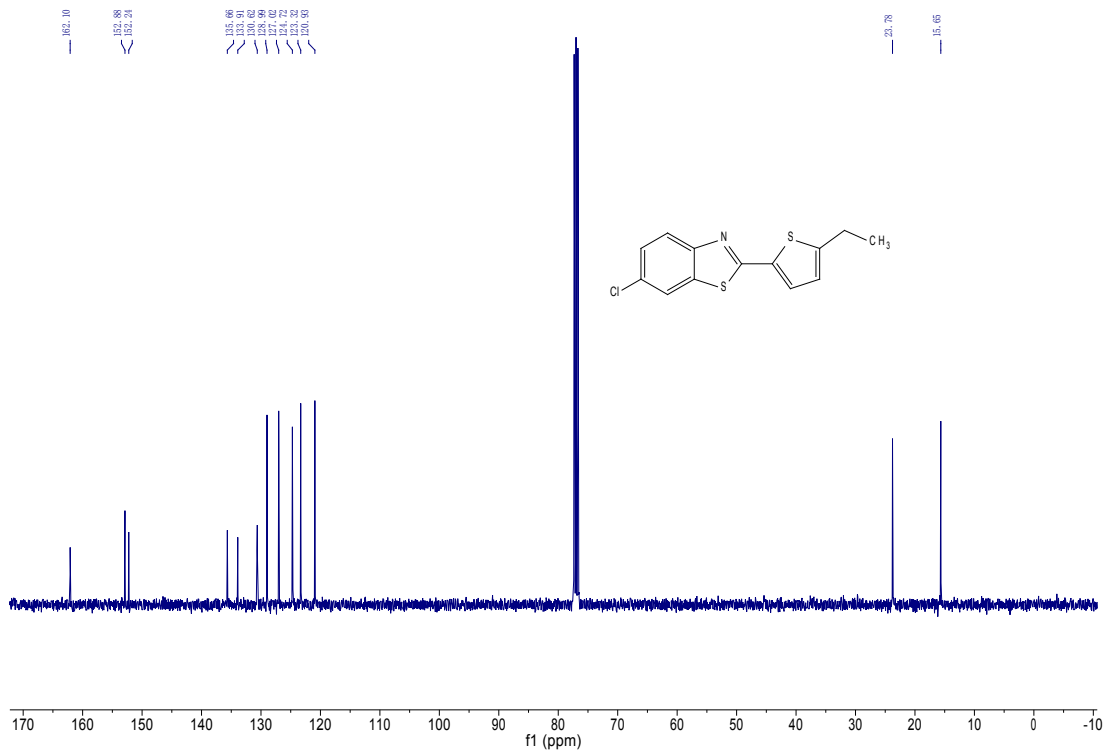

**3fb**

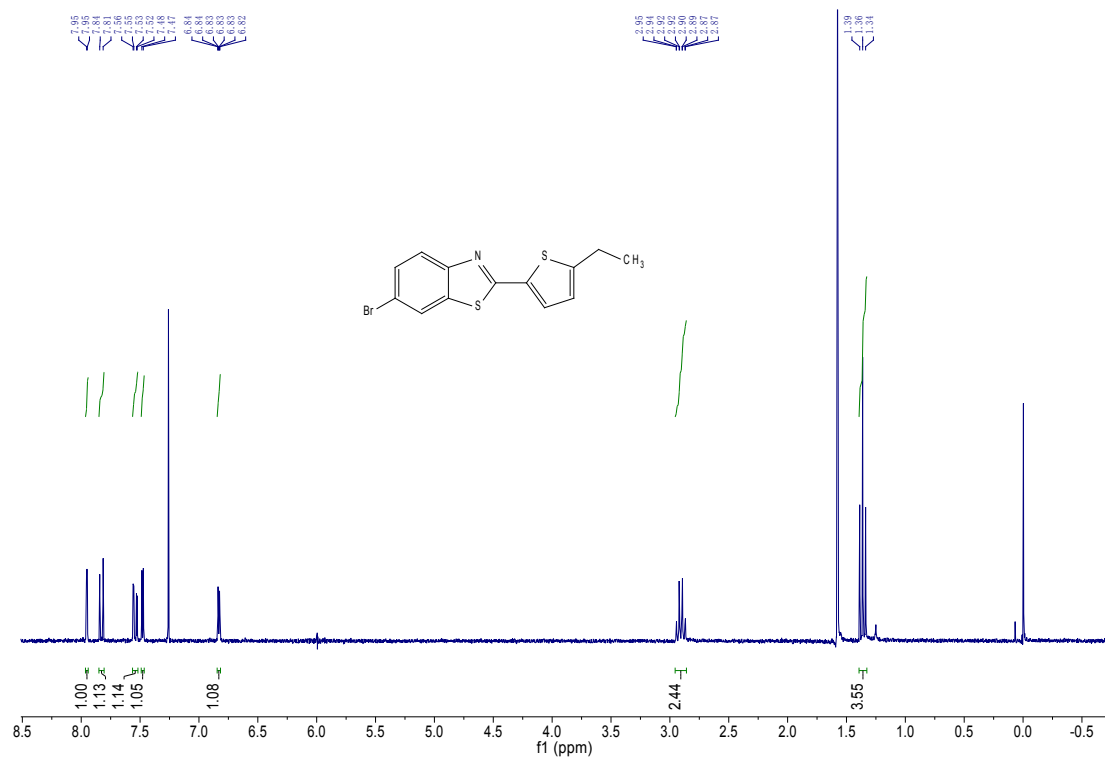

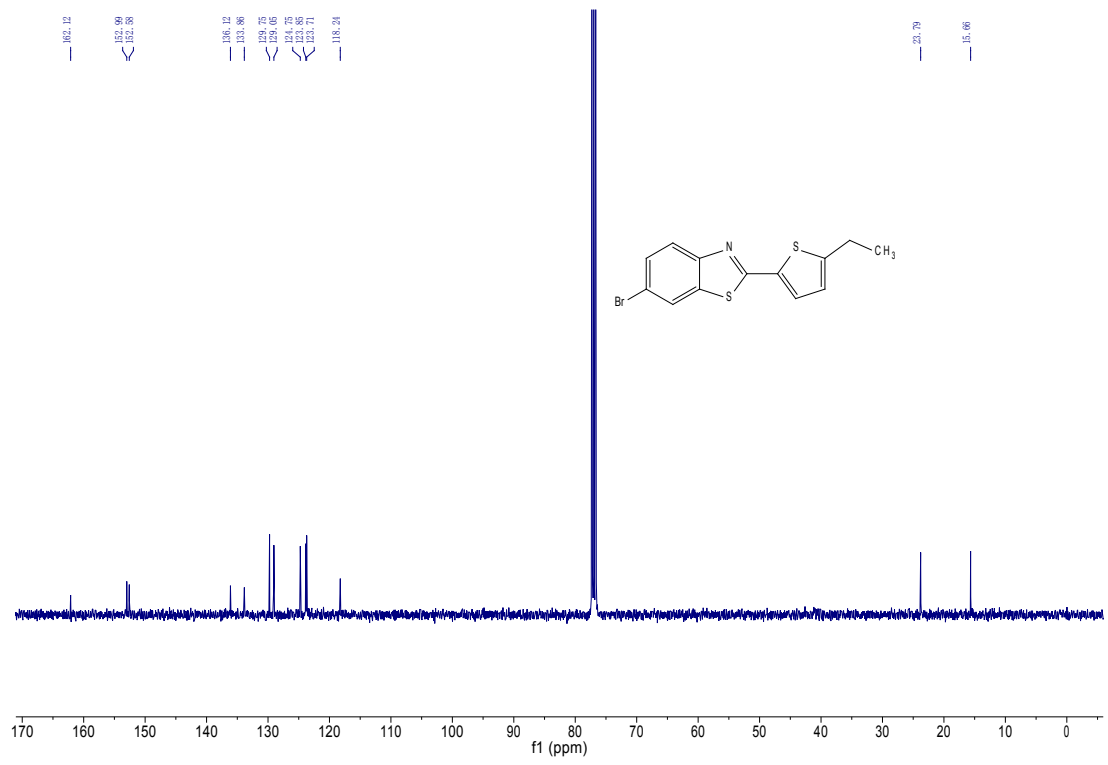

**3gb**

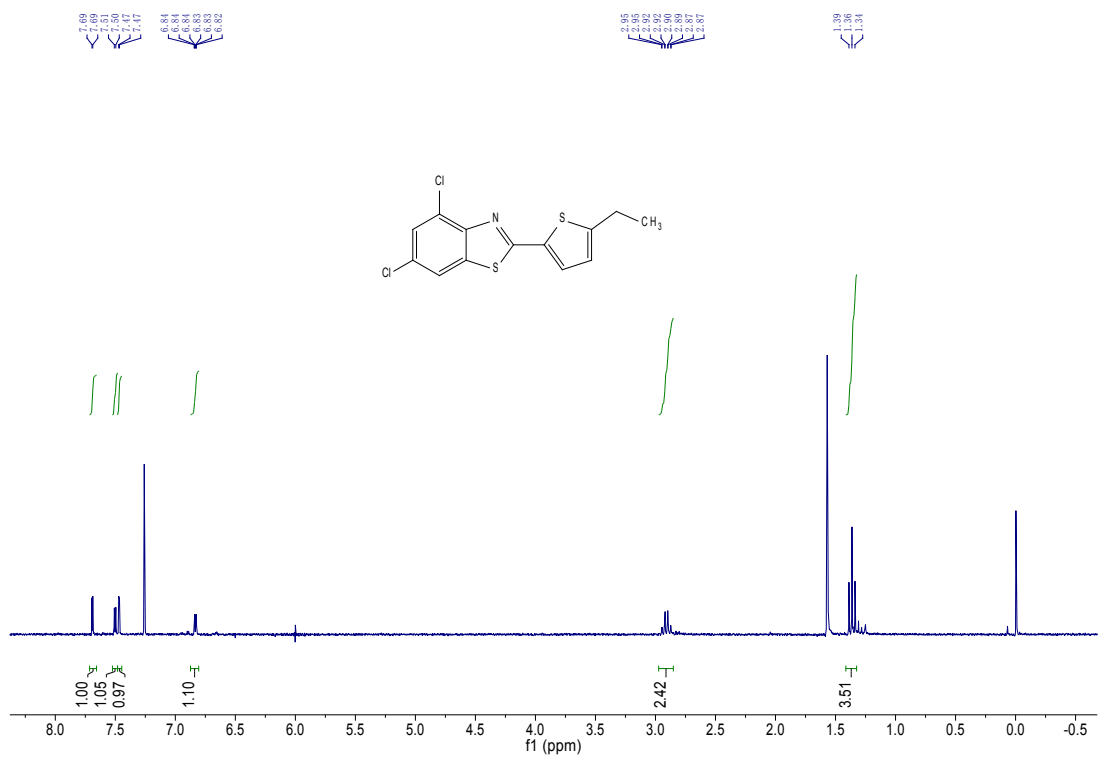

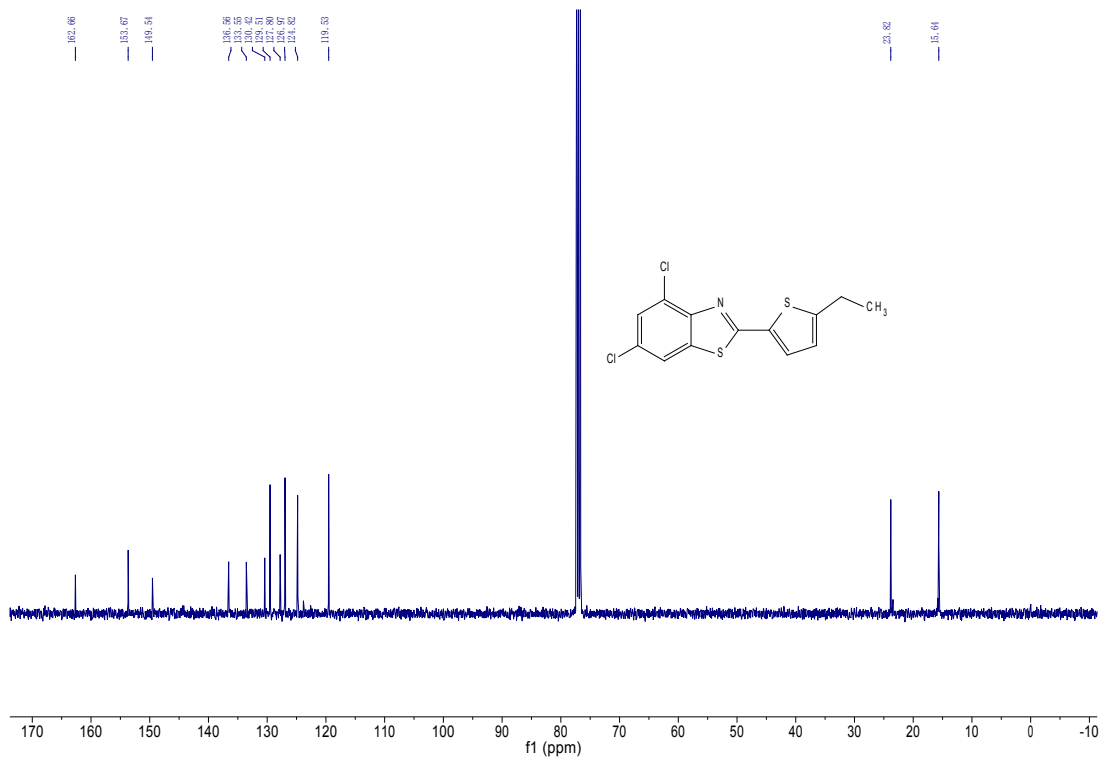

**3hb**

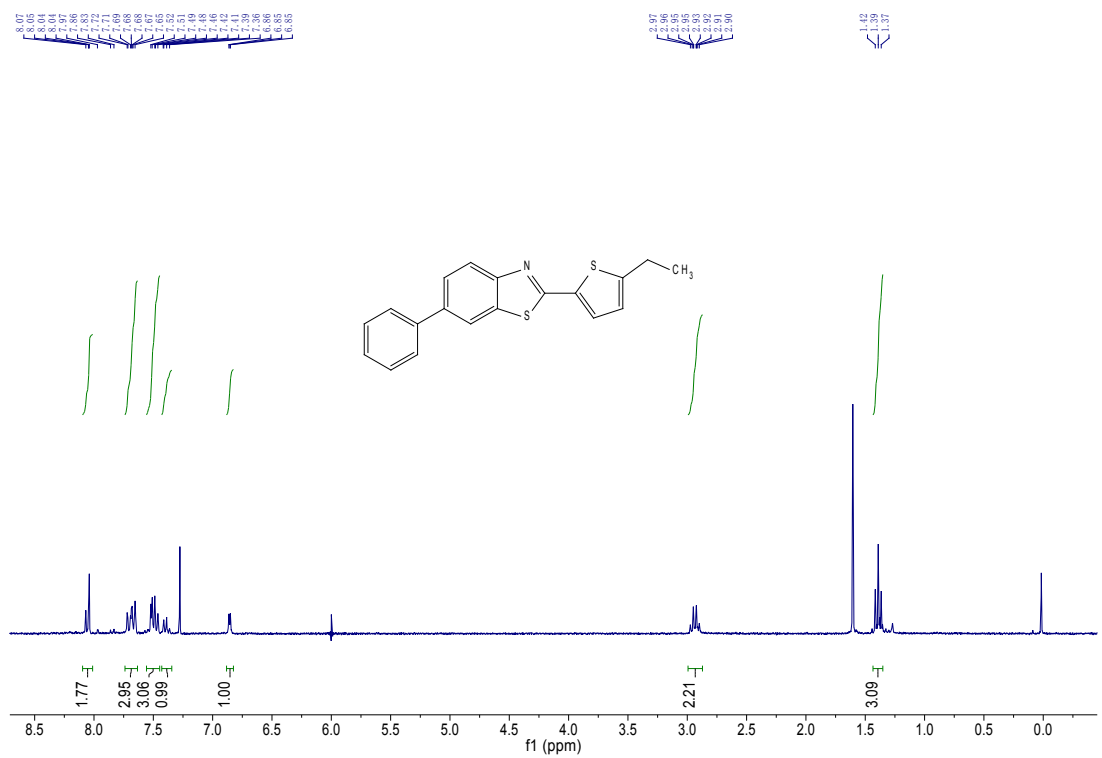

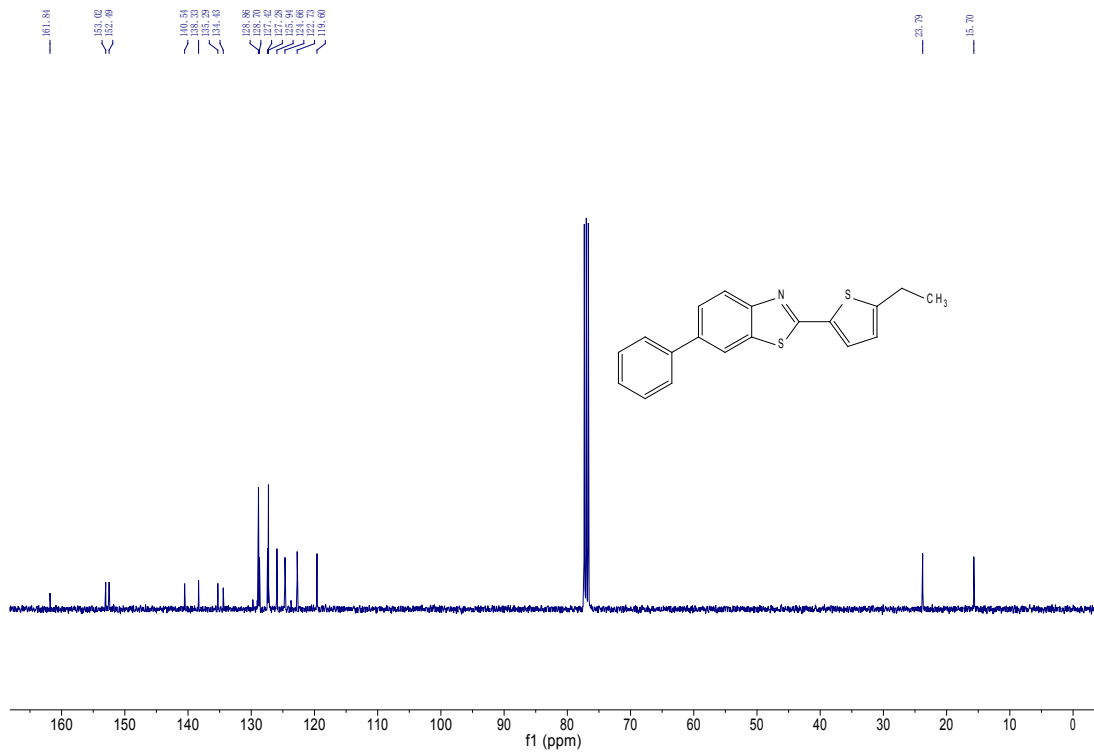

**3ib**

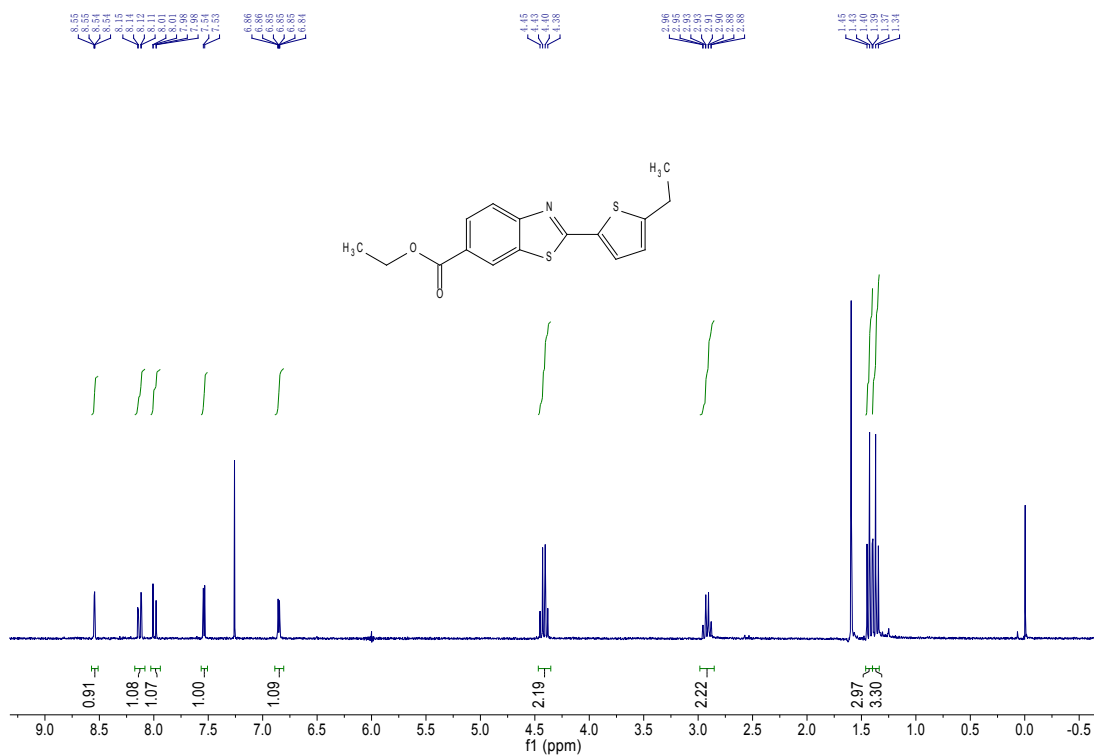

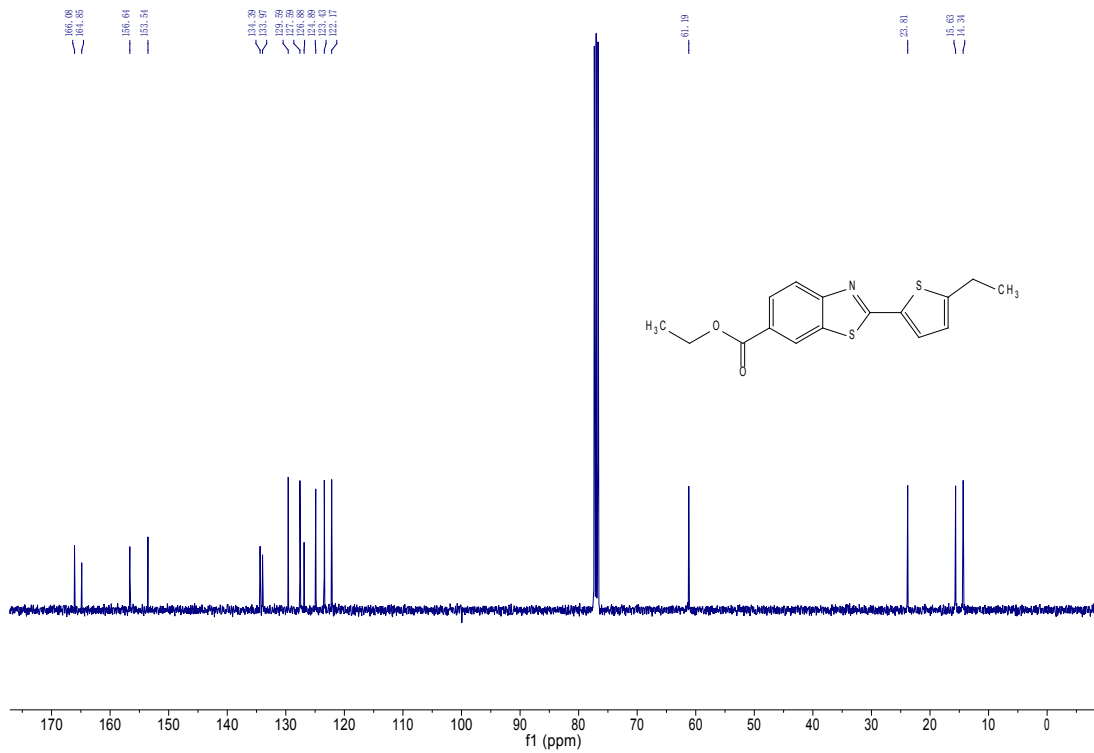

3jb

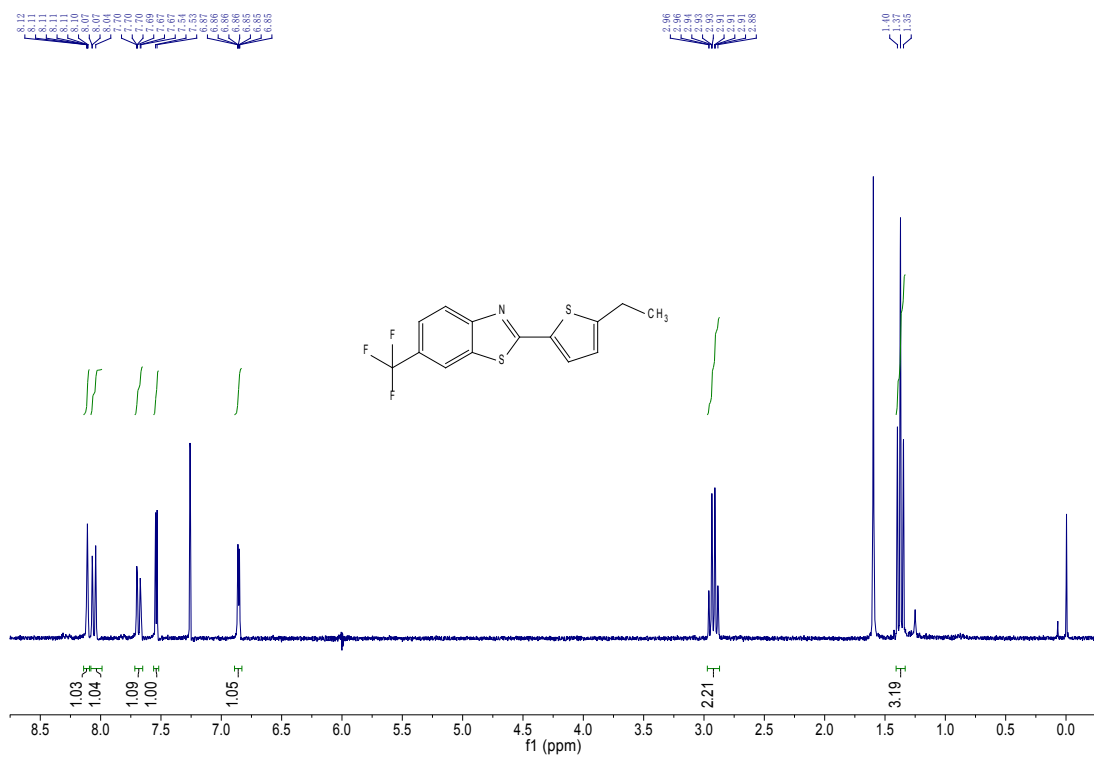



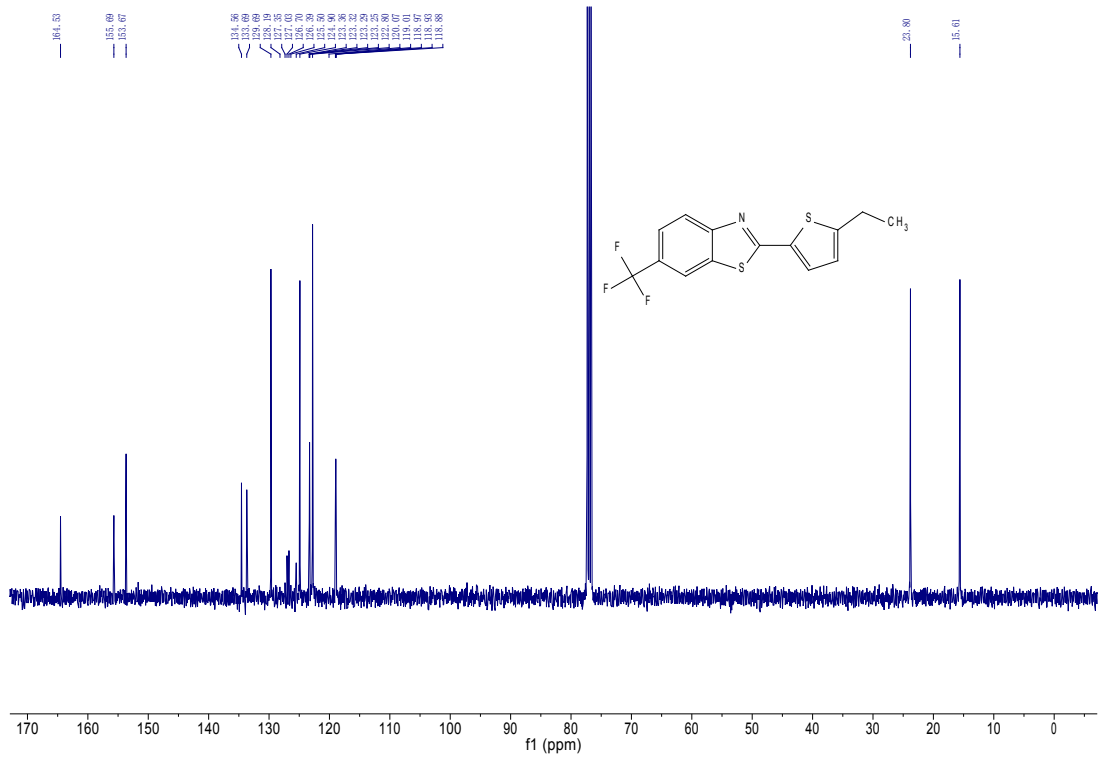

3kb

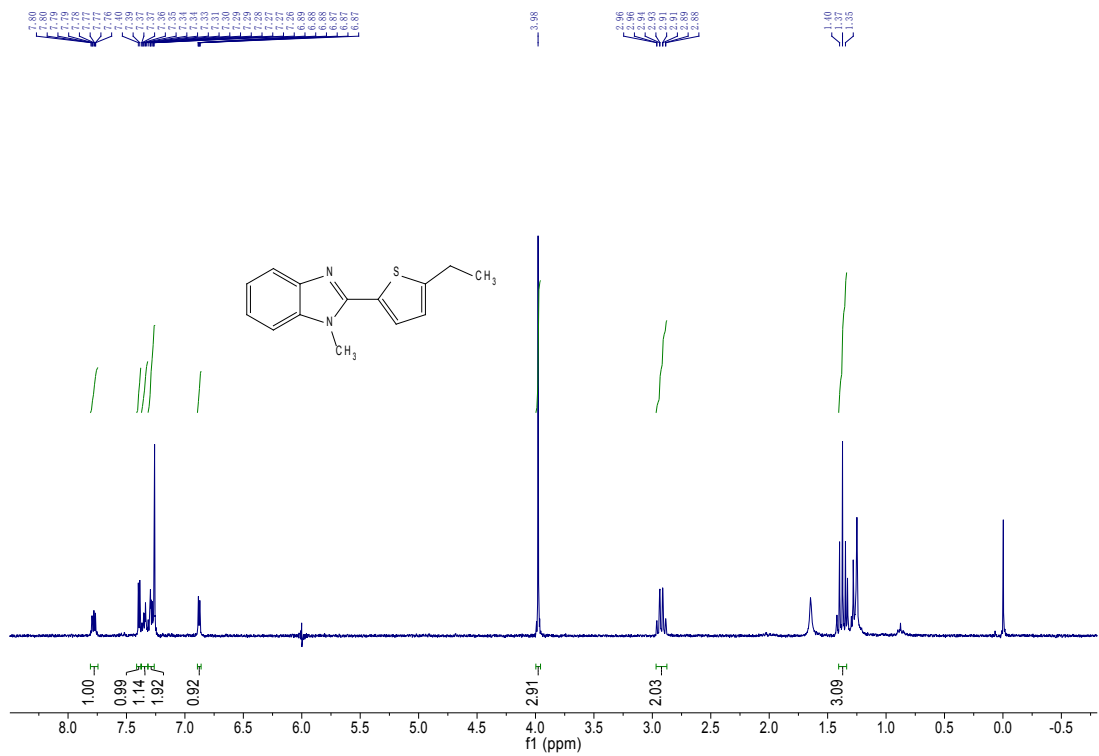

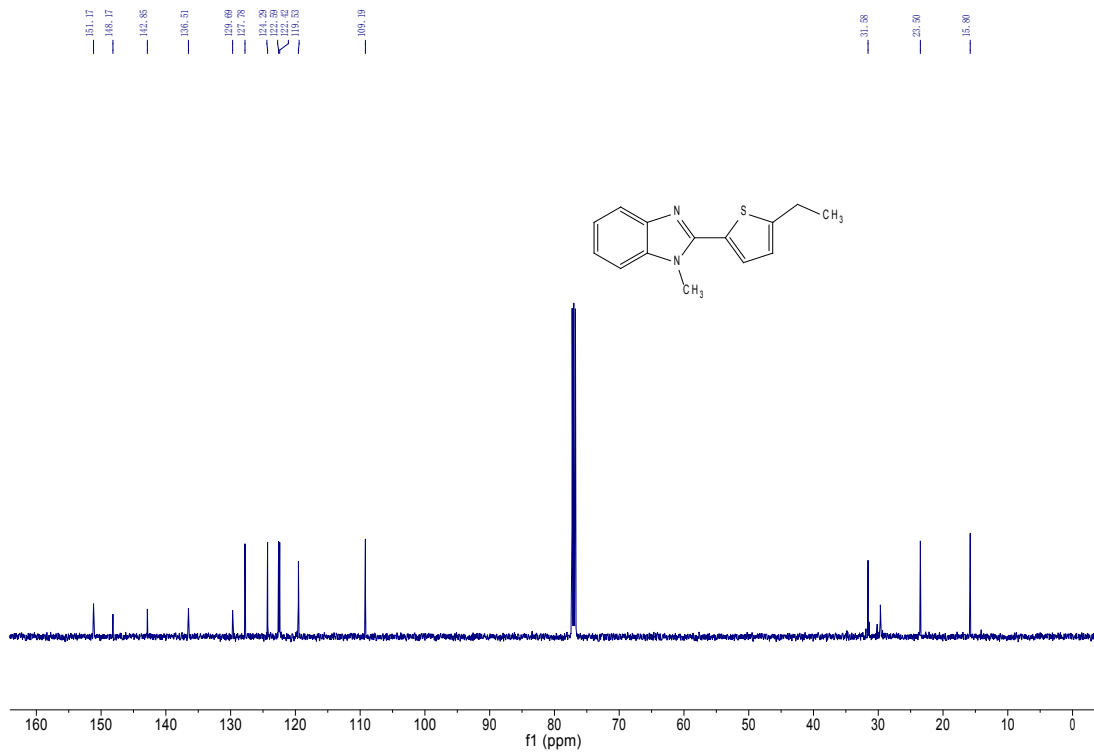

31b

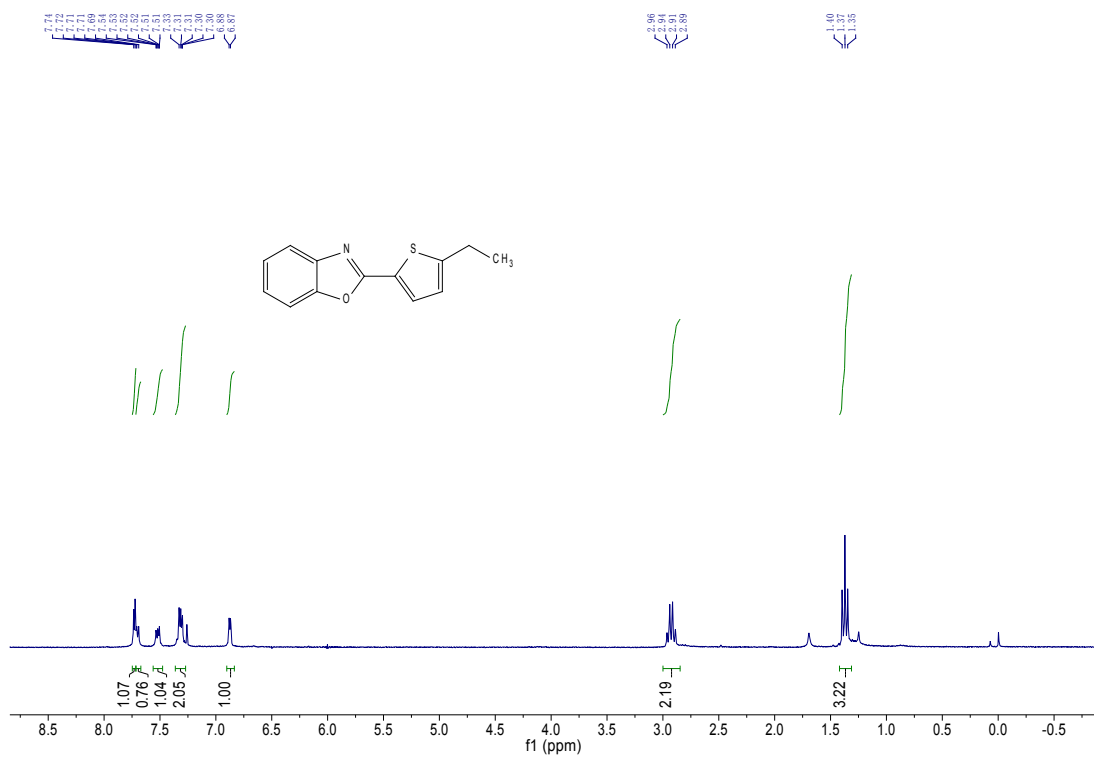

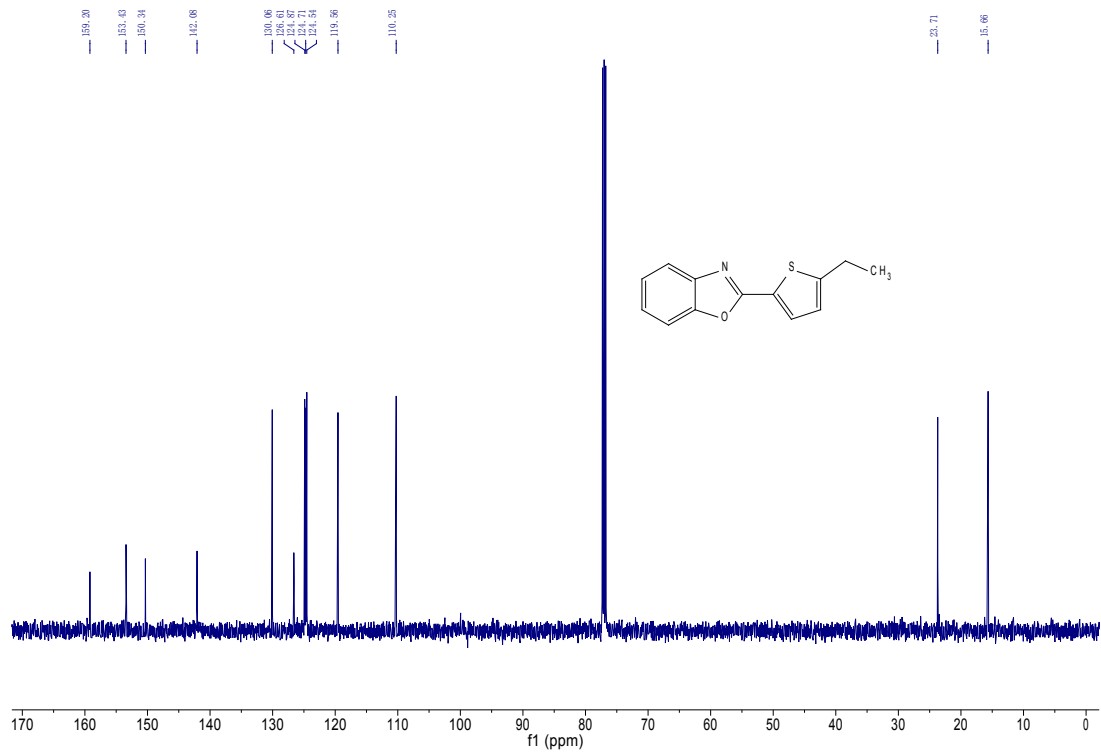

**3mb**

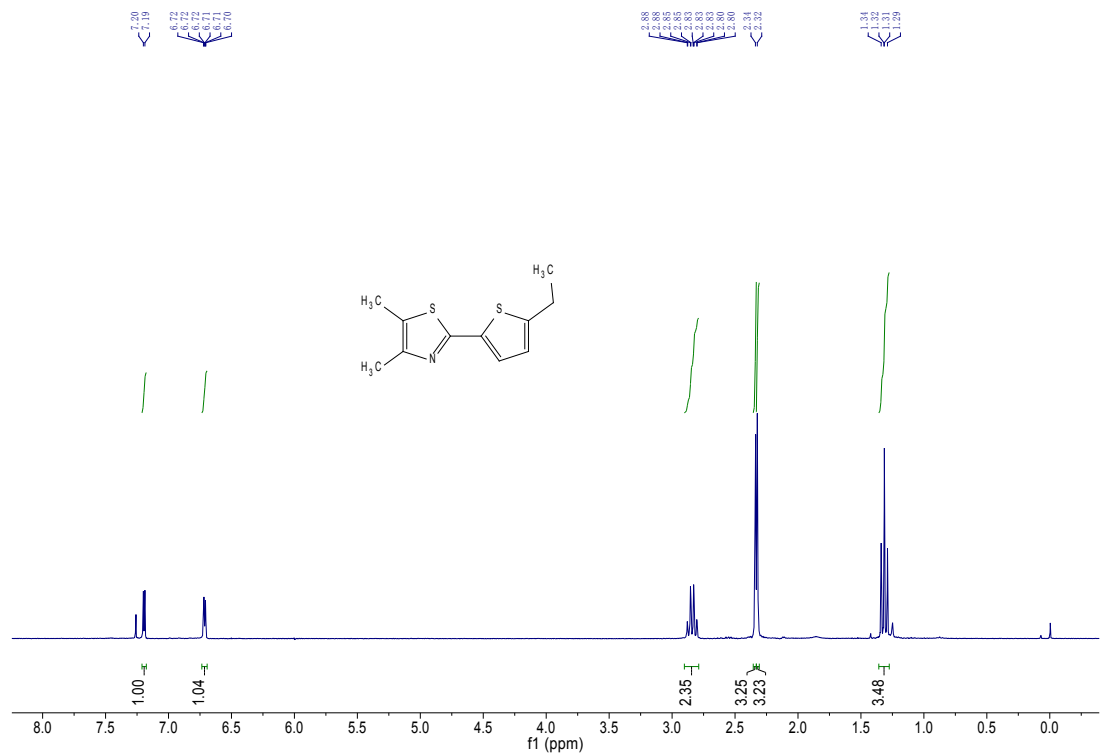

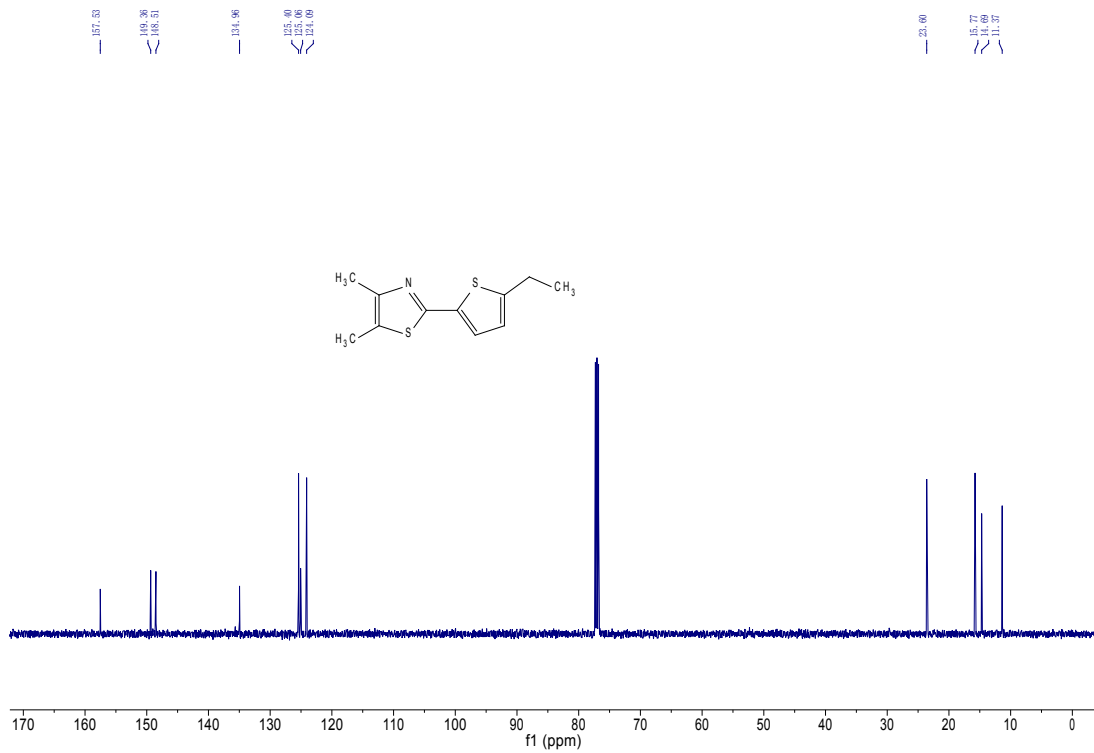

### 3bm

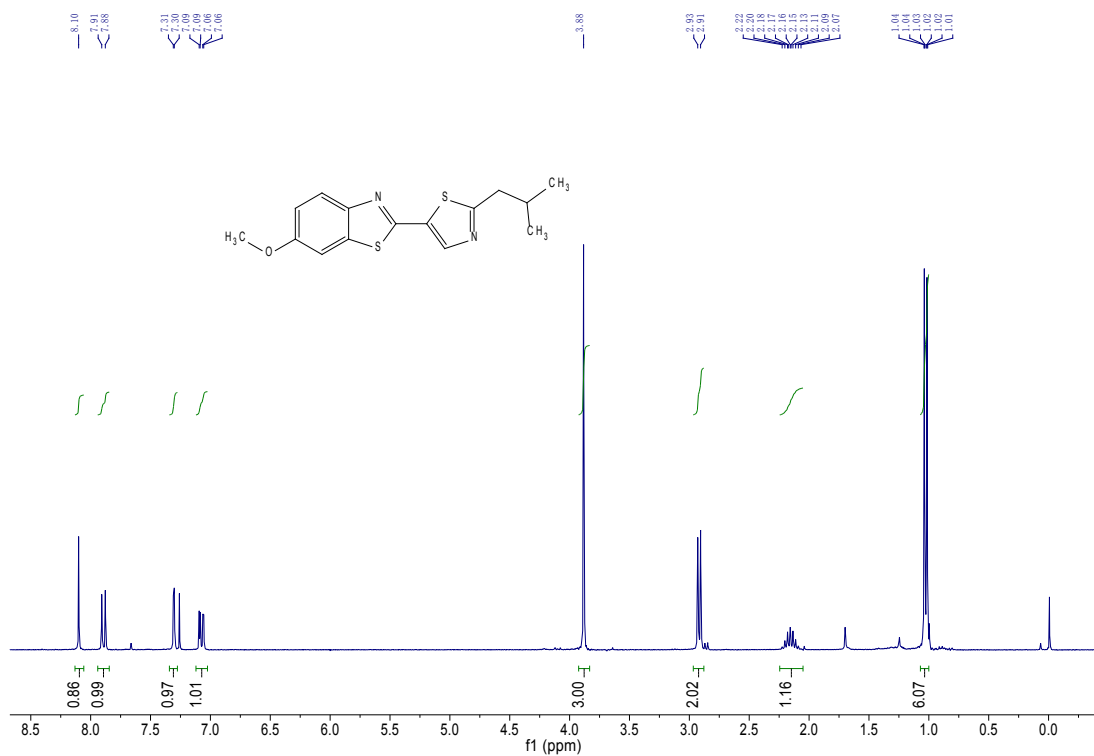

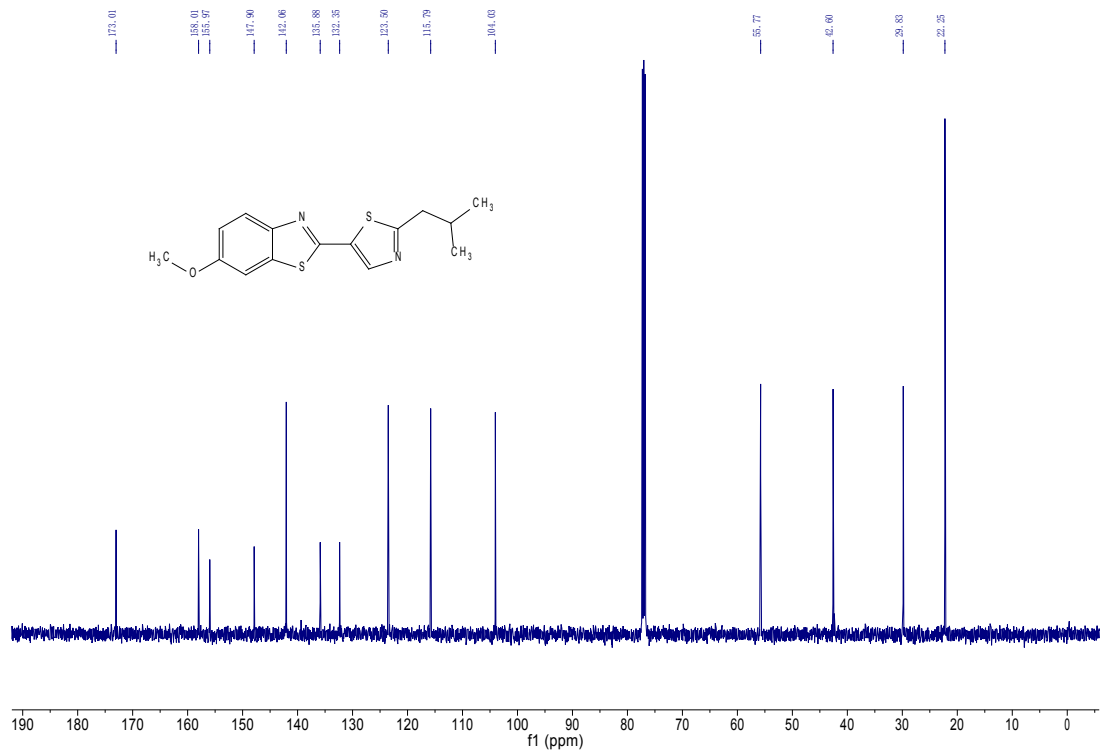

**3dm**

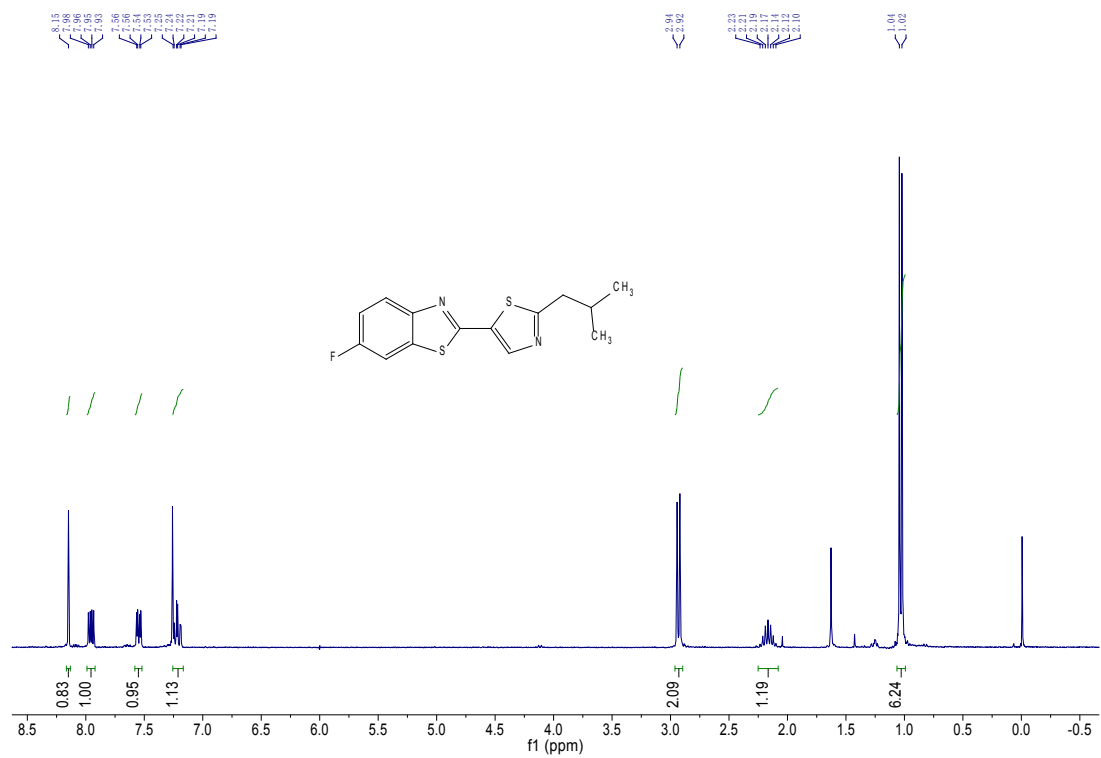

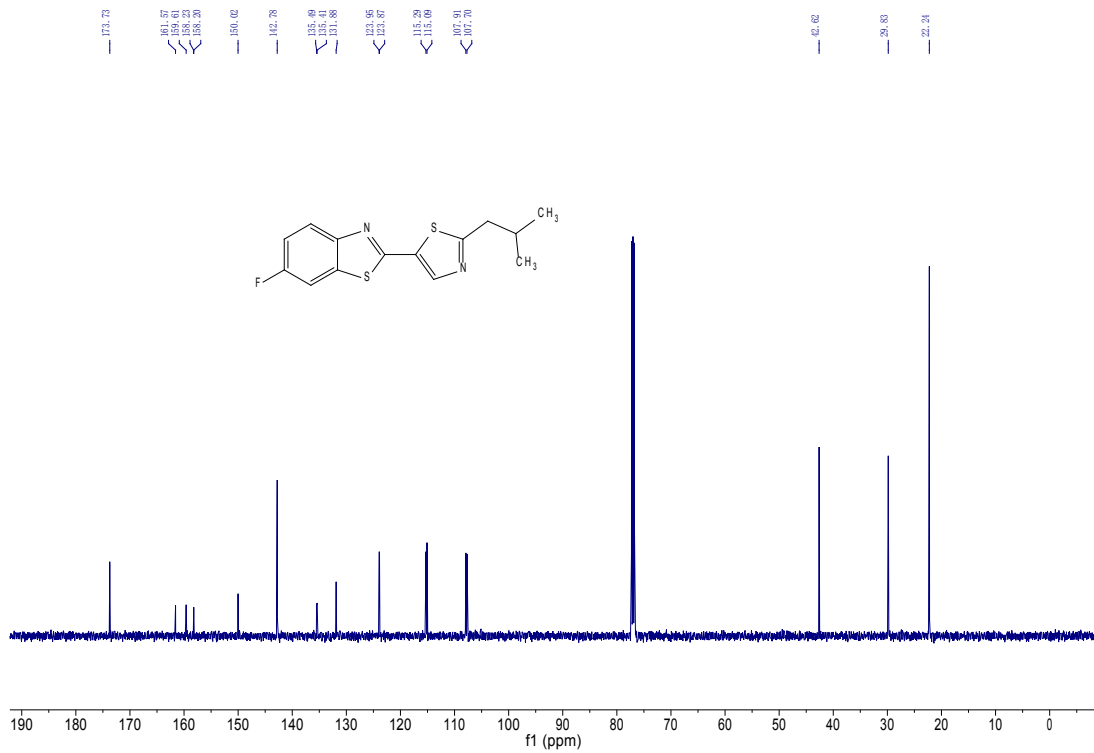

### 3em

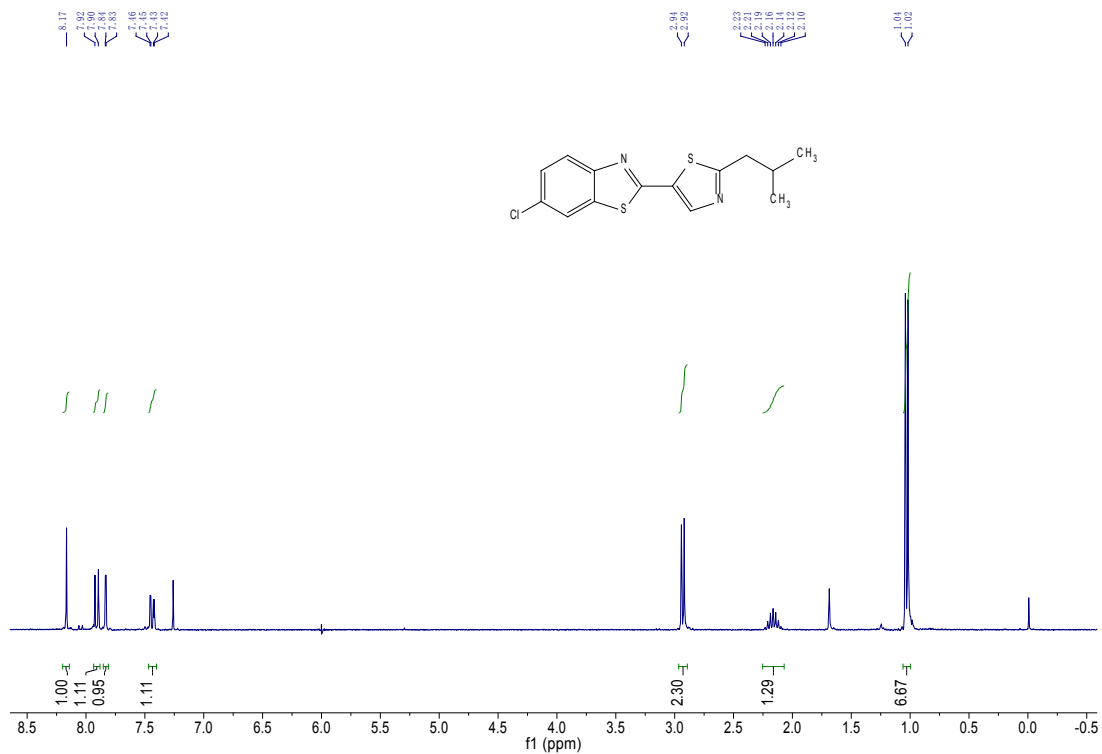

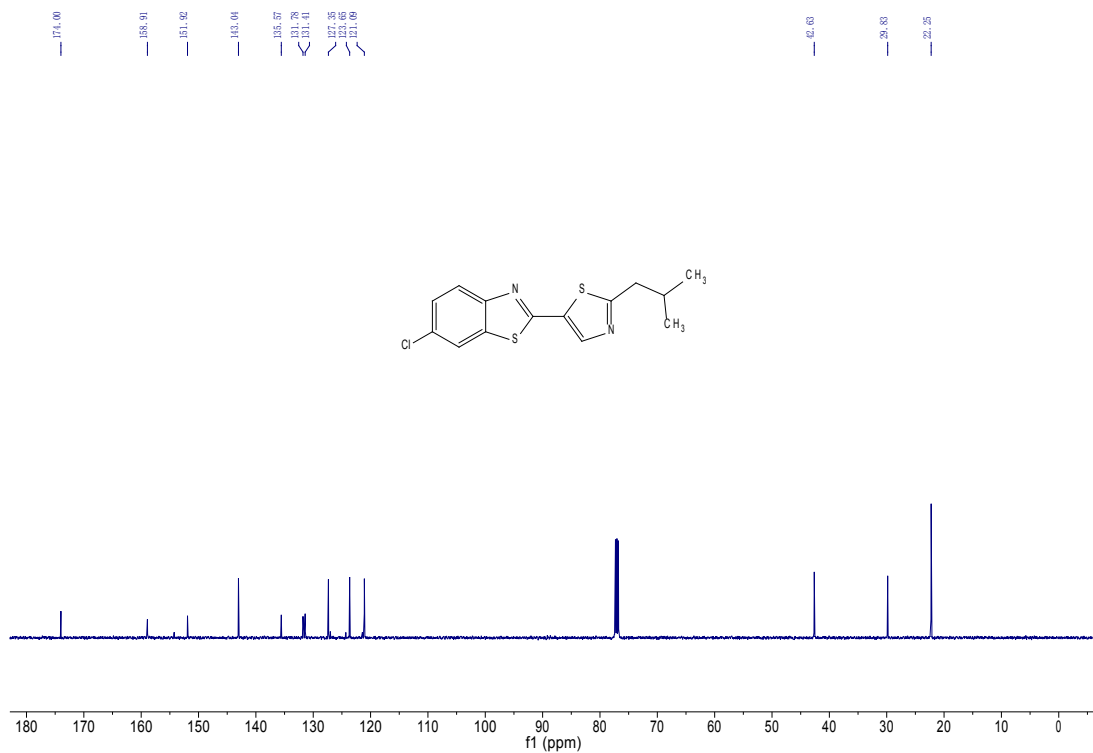

4m

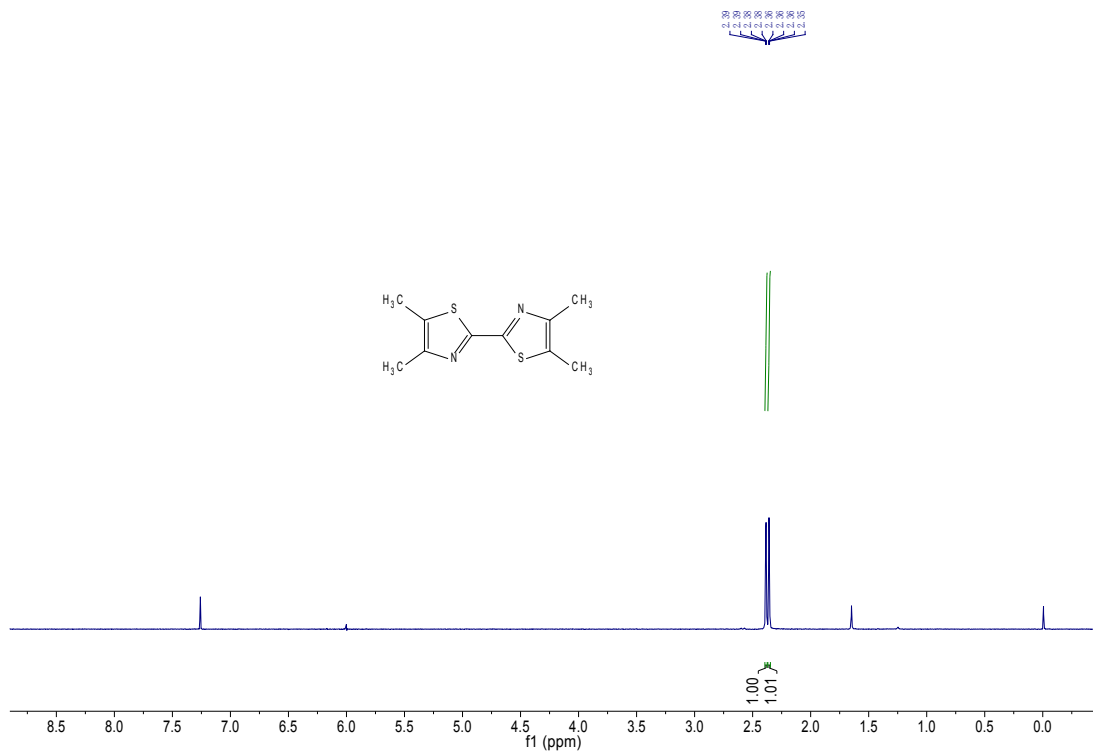

Supplement: c4cc00362d1.pdf [file c4cc00362d1.pdf]
